# Supplementary material for: Landscape and Climate Changes in Southeastern Amazonia from Quaternary Records of Upland Lakes
Source: MDPI journal article supplement (doi:10.3390/atmos14040621), 2023-03-24
Supplement: s1 [file s1]

Archive with 8 entries (8 files):
- Data S1 (MD TG 22MAR2023).pdf
- Fig. 1SM PART 1.tif
- Fig. 1SM PART2.tif
- Table S1.xlsx
- Table S2.xlsx
- Table S3.xlsx
- Table S4.xlsx
- Video S1.mp4
