# Supplementary material for: Landscape and Climate Changes in Southeastern Amazonia from Quaternary Records of Upland Lakes
Source: MDPI journal article supplement (doi:10.3390/atmos14040621), 2023-03-24
Supplement: s1 [file s1 › Table S1.xlsx]

## Sheet: Planilha1
Table S1
General description of the surface sediment samples and sediment cores collected from the upland lakes of the Carajás region.
Sample codes	Location	Geographic coordinates (UTM: 22M)		Lake types	Sample types	Sediment type
		Easting	Northing
VL 1	Serra Sul (S11D)	571791	9.29255e+06	Active	Surface	Organic mud
VL 2	Serra Sul (S11D)	571725	9.29243e+06	Active	Surface	Organic mud
VL 3	Serra Sul (S11D)	571672	9.29231e+06	Active	Surface	Fragmental peat
VL 4	Serra Sul (S11D)	571690	9.29233e+06	Active	Surface	Fragmental peat
VL 5	Serra Sul (S11D)	571487	9.2924e+06	Active	Surface	Fragmental peat
VL 7	Serra Sul (S11D)	571758	9.29262e+06	Active	Surface	Slightly oxidized mud
VL 9	Serra Sul (S11D)	571693	9.29269e+06	Active	Surface	Slightly oxidized mud
VL 10	Serra Sul (S11D)	571590	9.29263e+06	Active	Surface	Slightly oxidized mud
VL 11	Serra Sul (S11D)	571478	9.29257e+06	Active	Surface	Organic mud
VL 13A	Serra Sul (S11D)	571382	9.29263e+06	Active	Surface	Organic mud
VL 13B	Serra Sul (S11D)	571404	9.29263e+06	Active	Surface	Organic mud
VL 14	Serra Sul (S11D)	571545	9.29267e+06	Active	Surface	Slightly oxidized mud
VL 15	Serra Sul (S11D)	571644	9.29276e+06	Active	Surface	Slightly oxidized mud
VL 16	Serra Sul (S11D)	571592	9.29283e+06	Active	Surface	Mud sandy
VL 17	Serra Sul (S11D)	571506	9.29277e+06	Active	Surface	Slightly oxidized mud
VL 18	Serra Sul (S11D)	571289	9.29268e+06	Active	Surface	Fragmental peat
VL 19	Serra Sul (S11D)	571290	9.29275e+06	Active	Surface	Mud sandy
VL 20	Serra Sul (S11D)	571371	9.29284e+06	Active	Surface	Fragmental peat
VL 22	Serra Sul (S11D)	571185	9.29274e+06	Active	Surface	Fragmental peat
VL 25	Serra Sul (S11D)	570931	9.29286e+06	Active	Surface	Fragmental peat
VL 26	Serra Sul (S11D)	570917	9.29289e+06	Active	Surface	Fragmental peat
VL 27	Serra Sul (S11D)	570882	9.29285e+06	Active	Surface	Fragmental peat
VL 28	Serra Sul (S11D)	570837	9.29287e+06	Active	Surface	Fragmental peat
VL 29	Serra Sul (S11D)	570829	9.29289e+06	Active	Surface	Fragmental peat
VL 30	Serra Sul (S11D)	570853	9.29291e+06	Active	Surface	Fragmental peat
VL 31	Serra Sul (S11D)	570888	9.29291e+06	Active	Surface	Fragmental peat
AM 1	Serra Sul (S11D)	569452	9.29229e+06	Active	Surface	Organic mud
AM 2	Serra Sul (S11D)	569452	9292349	Active	Surface	Organic mud
AM 3	Serra Sul (S11D)	569454	9.2924e+06	Active	Surface	Organic mud
AM 4	Serra Sul (S11D)	569448	9.29245e+06	Active	Surface	Mud
AM 5	Serra Sul (S11D)	569446	9.2925e+06	Active	Surface	Organic mud
AM 6	Serra Sul (S11D)	569451	9.29255e+06	Active	Surface	Organic mud
AM 7	Serra Sul (S11D)	569448	9.2926e+06	Active	Surface	Organic mud
AM 8	Serra Sul (S11D)	569453	9.29265e+06	Active	Surface	Organic mud
AM 9	Serra Sul (S11D)	569450	9.2927e+06	Active	Surface	Organic mud
AM 10	Serra Sul (S11D)	569450	9.29275e+06	Active	Surface	Mud
AM 11	Serra Sul (S11D)	569445	9.2928e+06	Active	Surface	Mud
AM 13	Serra Sul (S11D)	569452	9.29285e+06	Active	Surface	Organic mud
AM 14	Serra Sul (S11D)	569467	9.29289e+06	Active	Surface	Organic mud
AM 15	Serra Sul (S11D)	569555	9.29289e+06	Active	Surface	Organic mud
AM 16	Serra Sul (S11D)	569548	9.29285e+06	Active	Surface	Mud
AM 17	Serra Sul (S11D)	569549	9.2928e+06	Active	Surface	Organic mud
AM 18	Serra Sul (S11D)	569551	9.29275e+06	Active	Surface	Organic mud
AM 19	Serra Sul (S11D)	569547	9.2927e+06	Active	Surface	Organic mud
AM 20	Serra Sul (S11D)	569552	9.29265e+06	Active	Surface	Organic mud
AM 21	Serra Sul (S11D)	569550	9.2926e+06	Active	Surface	Fragmental peat
AM 22	Serra Sul (S11D)	569551	9.29255e+06	Active	Surface	Organic mud
AM 23	Serra Sul (S11D)	569549	9.2925e+06	Active	Surface	Organic mud
AM 24	Serra Sul (S11D)	569549	9.29245e+06	Active	Surface	Mud
AM 25	Serra Sul (S11D)	569550	9.2924e+06	Active	Surface	Mud
AM 26	Serra Sul (S11D)	569547	9.29235e+06	Active	Surface	Mud
AM 30	Serra Sul (S11D)	569608	9.29264e+06	Active	Surface	Mud
AM 33	Serra Sul (S11D)	569590	9.2928e+06	Active	Surface	Mud
AM 34	Serra Sul (S11D)	569516	9.29291e+06	Active	Surface	Organic mud
AM 35	Serra Sul (S11D)	569442	9.29288e+06	Active	Surface	Organic mud
AM 36	Serra Sul (S11D)	569395	9.29279e+06	Active	Surface	Organic mud
AM 37	Serra Sul (S11D)	569394	9.2927e+06	Active	Surface	Mud
AM 39	Serra Sul (S11D)	569344	9.2925e+06	Active	Surface	Organic mud
AM 40	Serra Sul (S11D)	569329	9.29248e+06	Active	Surface	Organic mud
AM 41	Serra Sul (S11D)	569316	9.29242e+06	Active	Surface	Pebbles
AM 42	Serra Sul (S11D)	569352	9.29236e+06	Active	Surface	Organic mud
AM 45	Serra Sul (S11D)	569573	9.2924e+06	Active	Surface	Mud
AM 46	Serra Sul (S11D)	569582	9.2925e+06	Active	Surface	Mud
AM 47	Serra Sul (S11D)	569492	9.29252e+06	Active	Surface	Fragmental peat
AM 48	Serra Sul (S11D)	569494	9.29261e+06	Active	Surface	Organic mud
AM 49	Serra Sul (S11D)	569499	9.29274e+06	Active	Surface	Fragmental peat
TI-1.2	Serra Sul (S11A)	560987	9.2982e+06	Active	Surface	Fragmental peat
TI-1.3	Serra Sul (S11A)	561018	9.29818e+06	Active	Surface	Fragmental peat
TI-1.5	Serra Sul (S11A)	561002	9.29823e+06	Active	Surface	Organic mud
TI-1.8	Serra Sul (S11A)	560979	9.29828e+06	Active	Surface	Fragmental peat
TI-1.9	Serra Sul (S11A)	561023	9.29825e+06	Active	Surface	Organic mud
TI-1.12	Serra Sul (S11A)	561085	9.29827e+06	Active	Surface	Organic mud
TI-1.13	Serra Sul (S11A)	561019	9.29831e+06	Active	Surface	Organic mud
TI-1.15	Serra Sul (S11A)	561032	9.2984e+06	Active	Surface	Fragmental peat
TI-1.16	Serra Sul (S11A)	561079	9.29834e+06	Active	Surface	Organic mud
TI-1.17	Serra Sul (S11A)	561124	9.29831e+06	Active	Surface	Organic mud
TI-1.18	Serra Sul (S11A)	561154	9.29829e+06	Active	Surface	Fragmental peat
TI-1.19	Serra Sul (S11A)	561192	9.29831e+06	Active	Surface	Fragmental peat
TI-1.20	Serra Sul (S11A)	561146	9.29835e+06	Active	Surface	Organic mud
TI-1.21	Serra Sul (S11A)	561103	9.29839e+06	Active	Surface	Organic mud
TI-1.22	Serra Sul (S11A)	561062	9.29844e+06	Active	Surface	Organic mud
TI-1.24	Serra Sul (S11A)	561133	9.29843e+06	Active	Surface	Organic mud
TI-1.25	Serra Sul (S11A)	561191	9.29839e+06	Active	Surface	Organic mud
TI-1.26	Serra Sul (S11A)	561228	9.29834e+06	Active	Surface	Organic mud
TI-1.28	Serra Sul (S11A)	561205	9.29842e+06	Active	Surface	Organic mud
TI-1.29	Serra Sul (S11A)	561160	9.29846e+06	Active	Surface	Organic mud
TI-1.30	Serra Sul (S11A)	561131	9.29849e+06	Active	Surface	Fragmental peat
TI-1.31	Serra Sul (S11A)	561188	9.29853e+06	Active	Surface	Fragmental peat
TI-1.32	Serra Sul (S11A)	561229	9.29848e+06	Active	Surface	Fragmental peat
TI-1.33	Serra Sul (S11A)	561272	9.29843e+06	Active	Surface	Fragmental peat
TI-2.1	Serra Sul (S11A)	560915	9.29798e+06	Active	Surface	Fragmental peat
TI-2.2	Serra Sul (S11A)	560886	9.298e+06	Active	Surface	Fragmental peat
TI-2.3	Serra Sul (S11A)	560818	9.29804e+06	Active	Surface	Fragmental peat
TI-2.4	Serra Sul (S11A)	560761	9.29801e+06	Active	Surface	Fragmental peat
TI-2.5	Serra Sul (S11A)	560801	9.298e+06	Active	Surface	Fragmental peat
TI-2.6	Serra Sul (S11A)	560851	9.29796e+06	Active	Surface	Fragmental peat
TI-2.7	Serra Sul (S11A)	560941	9.29792e+06	Active	Surface	Fragmental peat
TI-2.8	Serra Sul (S11A)	560864	9.29791e+06	Active	Surface	Fragmental peat
TI-2.9	Serra Sul (S11A)	560780	9.29791e+06	Active	Surface	Fragmental peat
TI-2.10	Serra Sul (S11A)	560733	9.29794e+06	Active	Surface	Fragmental peat
TI-2.11	Serra Sul (S11A)	560719	9.29788e+06	Active	Surface	Fragmental peat
TI-2.12	Serra Sul (S11A)	560771	9.29788e+06	Active	Surface	Fragmental peat
TI-2.13	Serra Sul (S11A)	560828	9.29787e+06	Active	Surface	Fragmental peat
TI-2.14	Serra Sul (S11A)	560916	9.29788e+06	Active	Surface	Fragmental peat
TI-2.15	Serra Sul (S11A)	560956	9.29782e+06	Active	Surface	Fragmental peat
TI-2.16	Serra Sul (S11A)	560884	9.29784e+06	Active	Surface	Fragmental peat
TI-2.17	Serra Sul (S11A)	560805	9.29784e+06	Active	Surface	Fragmental peat
TI-2.18	Serra Sul (S11A)	560712	9.29782e+06	Active	Surface	Fragmental peat
TI-2.19	Serra Sul (S11A)	560755	9.29776e+06	Active	Surface	Fragmental peat
TI-2.20	Serra Sul (S11A)	560815	9.29779e+06	Active	Surface	Fragmental peat
TI-2.21	Serra Sul (S11A)	560874	9.2978e+06	Active	Surface	Fragmental peat
TI-2.22	Serra Sul (S11A)	560974	9.29778e+06	Active	Surface	Fragmental peat
TI-2.23	Serra Sul (S11A)	560995	9.29773e+06	Active	Surface	Fragmental peat
TI-2.24	Serra Sul (S11A)	560927	9.29772e+06	Active	Surface	Organic mud
TI-2.25	Serra Sul (S11A)	560846	9.29775e+06	Active	Surface	Organic mud
TI-2.26	Serra Sul (S11A)	560791	9.29772e+06	Active	Surface	Fragmental peat
TI-2.27	Serra Sul (S11A)	560856	9.29769e+06	Active	Surface	Fragmental peat
TI-2.28	Serra Sul (S11A)	560913	9.29768e+06	Active	Surface	Fragmental peat
TI-2.29	Serra Sul (S11A)	561003	9.29767e+06	Active	Surface	Fragmental peat
TI-2.30	Serra Sul (S11A)	560978	9.2976e+06	Active	Surface	Fragmental peat
TI-2.31	Serra Sul (S11A)	560926	9.29763e+06	Active	Surface	Fragmental peat
TI-2.32	Serra Sul (S11A)	560911	9.29776e+06	Active	Surface	Organic mud
TI-3.2	Serra Sul (S11A)	560987	9.29739e+06	Active	Surface	Fragmental peat
TI-3.3	Serra Sul (S11A)	561072	9.29728e+06	Active	Surface	Fragmental peat
TI-3.5	Serra Sul (S11A)	561165	9.29729e+06	Active	Surface	Organic mud
TI-3.6	Serra Sul (S11A)	561122	9.29739e+06	Active	Surface	Organic mud
TI-3.9	Serra Sul (S11A)	561191	9.29741e+06	Active	Surface	Organic mud
TI-3.10	Serra Sul (S11A)	561235	9.29736e+06	Active	Surface	Organic mud
TI-3.12	Serra Sul (S11A)	561337	9.29737e+06	Active	Surface	Fragmental peat
TI-3.14	Serra Sul (S11A)	561232	9.2975e+06	Active	Surface	Fragmental peat
TI-3.16	Serra Sul (S11A)	561330	9.29756e+06	Active	Surface	Organic mud
TI-3.17	Serra Sul (S11A)	561395	9.29749e+06	Active	Surface	Organic mud
TI-3.18	Serra Sul (S11A)	561444	9.29742e+06	Active	Surface	Organic mud
TI-3.19	Serra Sul (S11A)	561525	9.29747e+06	Active	Surface	Organic mud
TI-3.20	Serra Sul (S11A)	561452	9.29755e+06	Active	Surface	Organic mud
TI-3.21	Serra Sul (S11A)	561384	9.29765e+06	Active	Surface	Organic mud
TI-3.24	Serra Sul (S11A)	561482	9.29769e+06	Active	Surface	Fragmental peat
TI-3.25	Serra Sul (S11A)	561553	9.29762e+06	Active	Surface	Fragmental peat
TI-3.27	Serra Sul (S11A)	561630	9.29766e+06	Active	Surface	Fragmental peat
TI-3.28	Serra Sul (S11A)	561586	9.2977e+06	Active	Surface	Organic mud
TI-3.29	Serra Sul (S11A)	561542	9.29774e+06	Active	Surface	Organic mud
TI-3.32	Serra Sul (S11A)	561643	9.29774e+06	Active	Surface	Fragmental peat
TI-3.34	Serra Sul (S11A)	561494	9.29759e+06	Active	Surface	Organic mud
TI-3.35	Serra Sul (S11A)	561436	9.29768e+06	Active	Surface	Organic mud
TI-3.36	Serra Sul (S11A)	561026	9.29733e+06	Active	Surface	Organic mud
LTI3 (3 Irmãs)	Serra Sul (S11A)	561348	9297473	Active	Core	Mostly inorganic (detritic), organic (peat)
LV2 (Violão)	Serra Sul (S11D)	571529	9.29262e+06	Active	Core	Mostly inorganic (detritic), organic (peat), chemical (siderites)
LSL	Serra Leste	651290	9.33993e+06	Active	Core	Mostly organic (peat), inorganic (detritic)
R1	Serra Sul (S11B)	567836	9.29603e+06	Inactive	Core	Mostly organic (peat), chemical (siderites), inorganic (detritic)
R2	Serra Sul (S11D)	575418	9.29145e+06	Inactive	Core	Mostly inorganic (detritic), chemical (siderites), organic
R4	Serra Sul (S11A)	560552	9.30172e+06	Inactive	Core	Organic (peat), inorganic (detritic)
R5	Serra Sul (S11C)	567129	9.29735e+06	Inactive	Core	Mostly inorganic (detritic), chemical (siderites), organic (peat)
ST02	Serra do Tarzan	594346	9.30024e+06	Inactive	Core	Mostly inorganic (detritic), chemical (siderites), organic (peat)
LB3	Serra da Bocaína	620610	9.30189e+06	Inactive	Core	Organic (peat), inorganic (detritic)
LB4	Serra da Bocaína	617878	9.30033e+06	Inactive	Core	Mostly organic (peat), inorganic (detritic)
LTM2 (Trilha da Mata)	Serra Norte	600741	9.33225e+06	Inactive	Core	Mostly organic (peat), inorganic (detritic)
