# Supplementary material for: Landscape and Climate Changes in Southeastern Amazonia from Quaternary Records of Upland Lakes
Source: MDPI journal article supplement (doi:10.3390/atmos14040621), 2023-03-24
Supplement: s1 [file s1 › Table S2.xlsx]

## Sheet: Planilha1
Table S2
Radiocarbon dates (AMS) of the samples from Carajás region.
Samples	Lab. code	Material Pre-treatment	14C age (yr BP)	Cal. age, 2σ-range
LTI3.3-20-21	BETA 458621	Organic sediment: acid washes	1580 ± 30	1530-1395
LTI3.3-30-31	BETA 458622	Organic sediment: acid washes	3730 ± 30	4153-3981
LTI3.3-40-41	BETA 458623	Organic sediment: acid washes	4930 ± 30	5719-5594
LTI3.3-50-51	BETA 458624	Organic sediment: acid washes	7080 ± 30	6019-5892
LTI3.3-60-61	BETA 458625	Organic sediment: acid washes	5130 ± 30	3988-3913
LTI3.3-70-71	BETA 458626	Organic sediment: acid washes	8660 ± 30	7734-7593
LTI3.3-80-81	BETA 458627	Organic sediment: acid washes	9950 ± 40	9461-9296
LTI3.3-90-91	BETA 458628	Organic sediment: acid washes	12710 ± 40	13339-13061
LTI3.3-100-101	BETA 458629	Organic sediment: acid washes	15180 ± 50	16707-16333
LTI3.3-110-111	BETA 458630	Organic sediment: acid washes	18910 ± 60	21044-20643
LTI3.3-120-121	BETA 458631	Organic sediment: acid washes	28520 ± 150	31300-30117
LTI3.3-130-131	BETA 458632	Organic sediment: acid washes	40550 ± 500	42465-40963
LTI3.3-140-141	BETA 458633	Organic sediment: acid washes	39160 ± 420	4112-40388
LTI3.3-150-151	BETA 458634	Organic sediment: acid washes	42230 ± 610	43974-42150
LV2-5	BETA 373598	Organic sediment: acid washes	1800 ± 30	1675-1603
LV2-10	BETA 445943	Organic sediment: acid washes	7200 ± 30	8039-7939
LV2-20	BETA 443165	Organic sediment: acid washes	9540 ± 40	10897-10695
LV2-40	BETA 443164	Organic sediment: acid washes	12150 ± 40	13986-14157
LV2-60	BETA 443166	Organic sediment: acid washes	16830 ± 60	20184-20501
LV2-80	BETA 445944	Organic sediment: acid washes	19670 ± 70	23597-23381
LV2-100	BETA 445945	Organic sediment: acid washes	29380 ± 150	34345-33549
LV2-120	BETA 445946	Organic sediment: acid washes	34590 ± 230	40339-39284
LV2-140	BETA 443167	Organic sediment: acid washes	36470 ± 300	41945-41003
LV2-162	BETA 443168	Organic sediment: acid washes	41530 ± 540	45187-43259
LSL-17	BETA 445959	Organic sediment: acid washes	370 ± 30	425-505
LSL-50	BETA 445960	Organic sediment: acid washes	1750 ± 30	1565-1725
LSL-75	BETA 445961	Organic sediment: acid washes	2480 ± 30	2430-2720
LSL-100	BETA 445962	Organic sediment: acid washes	3280 ± 30	3450-3580
LSL-125	BETA 445963	Organic sediment: acid washes	3660 ± 30	3900-4085
LSL-150	BETA 445964	Organic sediment: acid washes	3880 ± 30	4235-4415
LSL-175	BETA 445965	Organic sediment: acid washes	5920 ± 30	6665-6800
LSL-194	BETA 445966	Organic sediment: acid washes	6800 ± 30	7590-7680
LSL-200	BETA 487413	Organic sediment: acid washes	8820 ± 30	9700-9950
LSL-220	BETA 487414	Organic sediment: acid washes	11600 ± 30	13330-13500
LSL-240	BETA 487415	Organic sediment: acid washes	11810 ± 30	13560-13740
R1-40	LACUFF 140366	Organic sediment: acid washes	1400 ± 30	1375-1280
R1-50	LACUFF 140367	Organic sediment: acid washes	3310 ± 45	3640-3450
R1-170	LACUFF 140368	Organic sediment: acid washes	10180 ± 80	12140-11590
R1-185	LACUFF 140369	Organic sediment: acid washes	10800 ± 115	12990-12530
R1-215	LACUFF 140370	Organic sediment: acid washes	13580 ± 65	16630-16145
R1-228	LACUFF 140371	Organic sediment: acid washes	18730 ± 115	22900-22380
R1-254	BETA 350937	Organic sediment: acid washes	25310 ±130	29729-28985
R1-332	LACUFF 140374	Organic sediment: acid washes	31990 ± 250	36390-35295
R1-369	LACUFF 140375	Organic sediment: acid washes	> 35000	Uncalibrated
R1-372	BETA 347777	Organic sediment: acid washes	29510 ± 170	34025-33375
R1-390	LACUFF 140376	Organic sediment: acid washes	31010 ± 260	35510-34410
R1-488	BETA 350938	Organic sediment: acid washes	27050 ± 150	31285-30860
R1-492	LACUFF 140377	Organic sediment: acid washes	26380 ± 250	31050-29980
R2-15	LACUFF 140378	Organic sediment: acid washes	1556 ± 36	1533-1370
R2-17	LACUFF 140379	Organic sediment: acid washes	2030 ± 30	2065-1900
R2-25	LACUFF 140380	Organic sediment: acid washes	3200 ± 55	3570-3340
R2-39	LACUFF 140381	Organic sediment: acid washes	4710 ± 50	5420-5320
R2-41	BETA 363900	Organic sediment: acid washes	3480 ± 30	3835-3690
R2-72	LACUFF 140382	Organic sediment: acid washes	12550 ± 60	15145-14440
R2-74	LACUFF 140383	Organic sediment: acid washes	14920 ± 70	18340-17930
R2-121	LACUFF 140384	Organic sediment: acid washes	17430 ± 175	21560-20580
R2-123	BETA 350939	Organic sediment: acid washes	16300 ± 60	19910-19500
R2-171	LACUFF 140385	Organic sediment: acid washes	14190 ± 70	17515-17040
R2-174	LACUFF 140386	Organic sediment: acid washes	16080 ± 70	19605-19195
R2-245	LACUFF 140387	Organic sediment: acid washes	26010 ± 150	30725-29770
R2-249	BETA 347778	Organic sediment: acid washes	34440 ± 280	39625-38400
R2-259	LACUFF 140388	Organic sediment: acid washes	25570 ± 285	30525-29004
R2-261	LACUFF 140389	Organic sediment: acid washes	20170 ± 100	24500-23960
R2-267	LACUFF 140390	Organic sediment: acid washes	> 35000	Uncalibrated
R2-327	BETA 350940	Organic sediment: acid washes	> 43500	Uncalibrated
R4-11	BETA 422171	Organic sediment: acid washes	390 ± 30	510-430
R4-20	BETA 422172	Organic sediment: acid washes	940 ± 30	925-790
R4-35	BETA 408082	Organic sediment: acid washes	3120 ± 30	3400-3245
R4-45	BETA 422173	Organic sediment: acid washes	2780 ± 30	2950-2795
R4-53	BETA 408083	Organic sediment: acid washes	1940 ± 30	1950-1820
R4-65	BETA 408084	Organic sediment: acid washes	6270 ± 30	7265-7160
R4-80	BETA 422174	Organic sediment: acid washes	6070 ± 40	7020-6800
R4-95	BETA 408085	Organic sediment: acid washes	8540 ± 30	9545-9490
R5-6	BETA 422175	Organic sediment: acid washes	790 ± 30 BP	733-671
R5-40	BETA 422176	Organic sediment: acid washes	4910 ± 30 BP	5664-5588
R5-44	BETA 422177	Organic sediment: acid washes	5830 ± 30 BP	6738-6551
R5-46	BETA 422178	Organic sediment: acid washes	5630 ± 40 BP	6489-6311
R5-50	BETA 408087	Organic sediment: acid washes	9690 ± 30 BP	11073-11205
R5-60	BETA 458642	Organic sediment: acid washes	6000 ± 30 BP	6905-6776
R5-70	BETA 458643	Organic sediment: acid washes	8670 ± 30 BP	9687-9544
R5-80	BETA 458644	Organic sediment: acid washes	13100 ± 40 BP	15854-15557
R5-100	BETA 422179	Organic sediment: acid washes	27020 ± 120 BP	31251-31008
R5-110	BETA 422180	Organic sediment: acid washes	22820 ± 80 BP	27305-27026
R5-130	BETA 422181	Organic sediment: acid washes	25250 ± 100 BP	29869-29217
R5-141	BETA 422182	Organic sediment: acid washes	20850 ± 80 BP	25233-24912
R5-180	BETA 408086	Organic sediment: acid washes	32000 ± 190 BP	36837-35988
ST2-20	BETA 434411	Organic sediment: acid washes	880 ± 30	828-723
ST2-35	BETA 434412	Organic sediment: acid washes	2350 ± 30	2466-2329
ST2-65	BETA 434413	Organic sediment: acid washes	7240 ± 30	8054-7973
ST2-75	BETA 434414	Organic sediment: acid washes	9010 ± 40	10245-10125
ST2-110	BETA 434415	Organic sediment: acid washes	25020 ± 110	29718-28988
ST2-120	BETA 434416	Organic sediment: acid washes	17140 ± 60	20858-20527
ST2-145	BETA 434417	Organic sediment: acid washes	14500 ± 50	17897-17434
ST2-148	BETA 434418	Organic sediment: acid washes	30400 ± 160	35227-34464
ST2-185	BETA 434419	Organic sediment: acid washes	33490 ± 210	39154-37565
ST2-195	BETA 434420	Organic sediment: acid washes	34560 ± 250	40347-39244
ST2-230	BETA 434421	Organic sediment: acid washes	34610 ± 250	40391-39283
ST2-250	BETA 434422	Organic sediment: acid washes	27320 ± 130	31607-31120
LB3-15	BETA 443145	Organic sediment: acid washes	115.8 ± 0.3 pMC	Uncalibrated
LB3-30	BETA 445956	Organic sediment: acid washes	20 ± 30	75-35
LB3-50	BETA 443146	Organic sediment: acid washes	1340 ± 30	1305-1235
LB3-75	BETA 443174	Organic sediment: acid washes	1050 ± 30	1005-925
LB3-100	BETA 443147	Organic sediment: acid washes	1150±30	1150-980
LB3-126	BETA 443148	Organic sediment: acid washes	3550 ± 30	3925-3810
LB3-145	BETA 443149	Organic sediment: acid washes	15530 ± 60	18915-18645
LB3-162	BETA 445957	Organic sediment: acid washes	22430 ± 80	27085-26430
LB3-185	BETA 443150	Organic sediment: acid washes	22470 ± 80	27110-26480
LB3-223	BETA 445958	Organic sediment: acid washes	35900 ± 280	41205-39875
LB3-240	BETA 443151	Organic sediment: acid washes	27140 ± 130	31315-30920
LB4 - 25	BETA 443157	Organic sediment: acid washes	1790 ± 30	1820-1690
LB4 - 50	BETA 443158	Organic sediment: acid washes	2510 ± 30	2645-2490
LB4 - 75	BETA 443159	Organic sediment: acid washes	4020 ± 30	4535-4420
LB4 - 98	BETA 443160	Organic sediment: acid washes	5040 ± 30	5900-5715
LB4 - 110	BETA 443161	Organic sediment: acid washes	8680 ± 40	9710-9540
LB4 - 130	BETA 443162	Organic sediment: acid washes	10500 ± 40	12590-12380
LB4 - 150	BETA 443163	Organic sediment: acid washes	11340 ± 40	13280-13095
LTM-10	BETA 422163	Organic sediment: acid washes	127.0 ± 0.3 pMC	Uncalibrated
LTM-25	BETA 464281	Organic sediment: acid washes	670 ± 30	630-675
LTM-35	BETA 434424	Organic sediment: acid washes	860 ± 30	695-800
LTM-55	BETA 422164	Organic sediment: acid washes	790 ± 30	670-750
LTM-75	BETA 434425	Organic sediment: acid washes	1130 ± 30	960-1090
LTM-95	BETA 464282	Organic sediment: acid washes	2000 ± 30 BP	1880-2005
LTM-110	BETA 422170	Organic sediment: acid washes	2010 ± 30 BP	1885-2010
LTM-112	BETA 422165	Organic sediment: acid washes	2360 ± 30	2330-2470
LTM-133	BETA 422166	Organic sediment: acid washes	14780 ± 50 BP	17815-18160
