# Supplementary material for: Landscape and Climate Changes in Southeastern Amazonia from Quaternary Records of Upland Lakes
Source: MDPI journal article supplement (doi:10.3390/atmos14040621), 2023-03-24
Supplement: s1 [file s1 › Table S3.xlsx]

## Sheet: Table 3SM
Table S3.
Analytical data of surface lake sediments (Violão (VL), Amendoim (AM) and Três Irmãs (TI-1, TI2, TI3) and catchment basin rocks and soils, and core lake sediments (R1, R2, R4, R5, LB1, LB2, LB3, LB4, ST02, LSL, LTD, LTM) Carajás, Brazil. (unit: major and minor elements (Si to TS) in %; trace and REEs in mg/kg).
		SiO2	TiO2	Al2O3	Fe2O3	MnO	MgO	CaO	Na2O	K2O	P2O5	TOC	TS	Ba	Sr	Rb	Pb	Sc	Th	U	Zr	Hf	Nb	Y	Cu	Zn	As	Se	Mo	Hg	V	Cr	Ga	Co	Ni	La	Ce	Pr	Nd	Sm	Eu	Gd	Tb	Dy	Ho	Er	Tm	Yb	Lu
VL	Minimum	4.34	0.32	3.76	5.39	0.01	0.04	0.01	0.01	0.02	0.33	3.88	0.04	8	3.7	0.6	14.3	5	6	1	77.2	1.9	6.7	7.8	24.1	11	0.5	1.7	0.8	0.13	37	34.21	8	0.2	4	13.5	27.7	2.68	9.4	1.69	0.41	1.27	0.23	1.4	0.23	0.61	0.11	0.7	0.09
n=26	Maximum	28.7	1.24	9.2	69.28	0.03	0.62	0.16	0.01	0.07	0.76	43.48	0.23	113	16.1	2.6	43.2	9	14.4	2.5	491.6	12.1	21.2	17.8	222.5	135	5.5	7.3	3.2	0.59	150	157.366	27.4	3.1	22.1	27	57.1	5.61	21.5	3.6	0.88	2.89	0.46	2.82	0.59	1.76	0.28	1.94	0.3
	Mean	16.4058	0.707692	6.20808	30.7231	0.0107692	0.116154	0.05	0.01	0.0392308	0.532692	23.9862	0.129615	30.2308	8.16154	1.46538	21.7731	6.69231	10.2577	1.80769	227.642	5.68846	14.15	12.55	59.2346	39.5385	1.71923	3.78462	2.12692	0.340385	83.6538	65.2622	15.8154	0.811538	8.78077	19.2846	39.1692	3.79885	13.6154	2.38769	0.575385	2.01269	0.326538	1.895	0.378077	1.16308	0.178846	1.24769	0.187308
	median	15.97	0.72	6.235	28.625	0.01	0.08	0.04	0.01	0.035	0.52	27.09	0.12	26	8.35	1.35	20.4	7	10.05	1.9	217.5	5.8	13.9	11.95	47.65	32	1.2	3.45	2.05	0.325	82.5	61.578	14.6	0.7	7.9	18.5	36.2	3.54	13.25	2.3	0.53	1.895	0.315	1.835	0.375	1.15	0.18	1.235	0.18
	Std. Deviation	7.12554	0.199225	1.46976	21.1266	0.00392232	0.13109	0.0356651	0	0.0132433	0.134478	12.7757	0.0589563	21.6376	2.66999	0.523788	6.1314	1.31967	2.41763	0.430742	91.8596	2.40854	3.53726	2.83722	41.3589	26.094	1.50732	1.43852	0.814645	0.129938	30.7934	24.343	4.48969	0.581259	4.36614	3.71448	7.38825	0.750921	3.09538	0.452197	0.124362	0.39647	0.0675244	0.379497	0.0951638	0.317336	0.0438476	0.31551	0.05738
	Skewness	-0.0244824	0.425906	0.158276	0.435325	5.09902	3.25515	1.3067	.	0.711383	0.202536	-0.238007	0.0933108	2.5146	0.797169	0.57425	1.69	0.281818	0.124611	-0.105761	0.788588	0.644306	-0.00249961	0.244455	2.87311	2.27124	1.14424	0.984454	-0.086209	0.344161	0.290971	2.24256	0.626193	2.60783	1.98237	0.517432	0.728517	0.704346	0.944194	0.661027	1.00313	0.48214	0.38168	0.664022	0.344495	0.175162	0.117927	0.23234	0.174399
	Kurtosis	-0.914304	0.761595	-0.369773	-1.21499	26	10.4383	2.10591	.	-0.317837	-1.309	-1.43777	-1.22995	8.13646	1.64728	-0.269529	4.69576	-0.923986	-0.936847	-1.02183	1.40347	0.674032	-0.359611	-1.0251	9.66885	6.51468	0.239137	1.06014	-1.51983	-0.626884	-0.506848	7.68383	0.294441	9.22273	4.39423	-0.545873	-0.139757	-0.116139	0.831672	0.526978	0.606141	-0.359567	-1.06597	-0.144342	-0.62516	-0.614169	-0.479184	-0.574926	-0.899803
	K-S Sig.	0.2	0.2	0.2	0.0425327	2.14544e-22	5.18273e-09	0.0414366		0.000114479	0.0597471	0.199209	0.2	0.0028711	0.2	0.2	0.2	0.0788567	0.194374	0.2	0.2	0.2	0.2	0.2	1.03541e-05	0.00655776	0.00394533	0.0186758	0.0293604	0.2	0.2	0.00152684	0.132998	0.000537586	0.00636779	0.2	0.0229405	0.0930964	0.2	0.2	0.00235501	0.147456	0.0591512	0.2	0.2	0.167547	0.2	0.2	0.2
	S-W Sig.	0.420006	0.768395	0.641399	0.0201355	6.83229e-11	3.07233e-08	0.00715038		0.00751824	0.0978994	0.03035	0.211385	3.4673e-05	0.124986	0.321882	0.00111779	0.0183762	0.267782	0.361797	0.2881	0.515713	0.943506	0.374183	2.17e-06	8.21432e-05	0.000230549	0.0283082	0.0228463	0.494605	0.422588	0.000146698	0.398114	2.87733e-05	9.55272e-05	0.289196	0.130525	0.210078	0.0928773	0.457758	0.00878199	0.272651	0.107115	0.148913	0.609188	0.529615	0.371991	0.941831	0.502052
AM	Minimum	5.01	0.23	2.4	31.59	0.01	0.01	0.01	0.01	0.01	0.38	6.51	0.04	12	3.3	0.9	5.7	2	3.8	0.4	76	2	3.8	3.8	12.5	25	0.8	0.8	1.8	0.14	40	40	4.6	0.2	3.3	6.2	12.6	1.21	4.4	0.69	0.14	0.74	0.08	0.63	0.08	0.39	0.04	0.38	0.03
n=39	Maximum	15.73	0.85	8.86	70.05	0.02	0.06	0.06	0.1	0.09	0.74	23.71	0.25	60	10.7	3.6	16.1	8	11.9	2.1	259	7.4	15.5	13	34.9	66	4.2	6.4	4.2	0.39	93	100	15.4	1.8	15.7	23.5	46.6	4.64	16.2	2.83	0.65	2.52	0.4	2.57	0.5	1.55	0.23	1.62	0.26
	Mean	9.53846	0.484615	5.92205	50.5282	0.0107692	0.024359	0.0307692	0.0207692	0.0438462	0.61641	13.641	0.0864103	23.5128	6.24103	1.71282	12.5359	5.5641	7.84103	1.34103	140.821	3.79231	8.75641	8.04359	23.8641	38.6923	1.92051	3.57692	3.23077	0.222051	64.9231	70	9.72564	0.933333	5.9641	16.3795	31.7821	3.14462	11.1846	1.93026	0.415641	1.69949	0.247436	1.44359	0.288205	0.910769	0.12641	0.916154	0.131795
	median	9.01	0.45	5.66	49.33	0.01	0.02	0.03	0.01	0.04	0.63	13.2	0.08	21	5.8	1.7	13.2	6	7.8	1.3	132.6	3.5	8.1	7.4	26	38	1.9	3.5	3.3	0.21	62	70	9.3	0.9	5.6	16	32	3.2	11.4	1.99	0.44	1.72	0.25	1.35	0.28	0.89	0.12	0.92	0.13
	Std. Deviation	2.65979	0.148782	1.62787	7.372	0.00269953	0.0116517	0.0117842	0.0204405	0.0171088	0.0969397	3.89039	0.044158	10.7602	1.71368	0.529737	2.33559	1.2731	2.06305	0.375372	45.5008	1.2259	2.85968	2.12167	5.95847	7.84774	0.542984	1.19725	0.559207	0.0659018	14.2041	16.3836	2.67717	0.369447	2.01213	4.43895	7.79193	0.822413	3.10242	0.530702	0.125295	0.445244	0.0764584	0.439608	0.0929027	0.249161	0.047211	0.270113	0.0525593
	Skewness	0.884809	0.724562	-0.106096	0.232708	3.30388	0.952271	0.962871	2.8333	0.888637	-0.790353	0.530718	1.80136	1.81669	0.727723	1.40894	-1.07721	-0.392928	0.178198	-0.0396952	0.867377	0.925061	0.655222	0.449089	-0.540648	1.17189	1.86232	-0.231289	-0.882257	1.00249	0.429194	0.113534	0.311471	0.272226	2.9961	-0.260227	-0.306004	-0.350439	-0.328048	-0.44961	-0.470614	-0.229388	-0.230024	0.303936	-0.0674144	0.267257	0.188194	0.386747	0.0537838
	Kurtosis	0.000890475	-0.00680821	-0.446337	0.631223	9.3954	1.16374	0.545918	8.26058	0.757067	0.0163924	0.115486	4.02011	3.37702	0.14711	3.17049	0.706155	0.0611335	-0.82816	-0.105273	0.379585	0.786245	-0.244322	-0.263966	-0.536072	3.08223	7.66961	0.328253	1.1181	0.636294	-0.75368	-0.916664	-0.601031	-0.336479	14.0296	-0.878879	-0.434591	-0.530856	-0.900974	-0.329417	-0.405377	-0.76258	-0.564601	-0.291996	-0.0325526	0.465429	-0.418219	0.281649	0.0625978
	K-S Sig.	0.0108851	0.0923122	0.2	0.2	1.20984e-32	8.97301e-06	2.65575e-09	2.6357e-10	1.73227e-05	0.0511174	0.176947	3.26915e-05	0.00161567	0.0796436	0.0167545	0.00322896	0.0149699	0.169448	0.2	0.2	0.2	0.0339198	0.0844008	0.00848935	0.0162428	0.000138448	0.117597	0.0128091	0.144904	0.142333	0.0089939	0.2	0.106524	0.0448819	0.0826798	0.2	0.2	0.2	0.2	0.2	0.0717888	0.2	0.2	0.2	0.2	0.14097	0.2	0.2
	S-W Sig.	0.003577	0.0521588	0.473872	0.478631	1.89454e-12	0.000611216	0.000119511	1.92648e-09	0.00304698	0.0111569	0.399885	3.46431e-05	1.07213e-05	0.0886606	0.00279943	0.00244386	0.00838585	0.484439	0.838161	0.0304445	0.0423054	0.0484158	0.358535	0.0253253	0.00660836	7.21167e-05	0.738697	0.0134055	0.00395965	0.101754	0.0307899	0.452802	0.634335	6.42849e-07	0.103036	0.586128	0.493562	0.154966	0.392708	0.192191	0.485386	0.79636	0.551519	0.95771	0.694578	0.59147	0.833288	0.712437
TL1	Minimum	1.26	0.15	1.72	1.32	0.01	0.01	0.01	0.01	0.01	0.06	6.84	0.02	8	2.1	0.3	5.5	3	2.2	0.4	41	0.9	2.5	2.1	19.7	2	0.5	3	0.5	0.08	23	20	2.7	0.4	2.7	5.4	9.6	0.91	3.3	0.49	0.11	0.42	0.06	0.39	0.07	0.19	0.03	0.25	0.03
n=24	Maximum	13.74	1.26	12.73	60.18	0.01	0.05	0.03	0.01	0.1	0.56	57.29	0.31	91	11.9	3.9	28.8	13	14.8	3.2	443	11.8	19.6	15.2	84.3	55	4.1	7.5	4.3	0.31	160	140	23	2	9.7	28	54.6	5.3	19.1	3.49	0.77	2.87	0.45	2.86	0.53	1.72	0.27	1.73	0.28
	Mean	7.84458	0.76125	7.77875	31.9667	0.01	0.0204167	0.0208333	0.01	0.055	0.392083	24.415	0.11875	26.3333	7.3625	2.10833	17.2375	8.875	9.675	1.5125	208.542	5.0625	12.1292	9.60833	32.6917	29.2083	1.65833	5.12083	2.65417	0.17875	108.042	91.25	14.5417	0.983333	5.475	16.7875	31.875	3.28167	11.7	2.05375	0.452917	1.80042	0.276667	1.7225	0.347917	1.07667	0.167917	1.13083	0.175417
	median	7.56	0.78	8.1	37.87	0.01	0.02	0.02	0.01	0.06	0.475	16.89	0.1	22	7.85	2.1	19.15	9.5	11.05	1.55	217	4.95	12.6	10.75	31.1	34.5	1.15	5	3.25	0.165	116	105	16.6	1	5.45	19.2	35.25	3.705	13.75	2.21	0.515	1.935	0.295	1.87	0.37	1.145	0.18	1.19	0.185
	Std. Deviation	3.68082	0.315323	3.46847	19.5796	0	0.010417	0.00717282	0	0.0257074	0.173455	17.7605	0.0977269	17.9387	2.95662	1.08584	5.9489	3.41751	3.84835	0.648284	95.5679	2.43325	5.09932	3.98856	11.8605	16.4976	1.14471	1.24236	1.2813	0.0637463	45.1726	38.3703	5.99477	0.349741	1.76247	6.26698	12.7139	1.31866	4.77457	0.865311	0.187674	0.730744	0.117461	0.722359	0.145063	0.454673	0.0712606	0.464692	0.0740141
	Skewness	-0.207458	-0.487625	-0.666024	-0.475927	.	1.16976	-0.124956	.	-0.410397	-1.10705	0.935188	0.616768	2.06482	-0.29945	-0.234213	-0.573827	-0.703744	-0.907466	0.161982	0.126062	0.497679	-0.569896	-0.780338	3.76436	-0.519093	0.589192	0.301871	-0.669698	0.519562	-0.926045	-0.995795	-0.822076	0.976533	0.65133	-0.463775	-0.535666	-0.667465	-0.722996	-0.582275	-0.591772	-0.773978	-0.620631	-0.640636	-0.745502	-0.750042	-0.622962	-0.623961	-0.566221
	Kurtosis	-0.874723	-0.487874	-0.702852	-1.04247	.	1.55642	-0.911569	.	-0.727179	-0.391105	-0.67571	-1.16566	6.51688	-1.14818	-0.8729	-0.281659	-0.709765	-0.345008	0.952508	0.484266	1.42411	-0.592603	-0.520041	16.9772	-1.06234	-0.964315	-0.590209	-1.08351	-0.328036	-0.404316	-0.34657	-0.481134	1.82063	0.0753258	-0.734617	-0.648489	-0.752641	-0.707025	-0.645437	-0.630369	-0.492026	-0.707783	-0.692591	-0.600754	-0.26806	-0.621662	-0.613339	-0.607374
	K-S Sig.	0.2	0.2	0.2	0.154188		0.000121805	0.000310445		0.2	9.0881e-06	0.000988116	0.0339196	0.148997	0.2	0.2	0.0487366	0.175504	0.0726735	0.119646	0.2	0.2	0.2	0.0201595	4.95236e-06	0.109668	0.0165584	0.2	0.00940193	0.2	0.0278901	0.0184884	0.0755085	0.108924	0.2	0.0437902	0.0690119	0.110305	0.0110327	0.180391	0.0392665	0.0262824	0.2	0.080916	0.102446	0.17252	0.2	0.0909314	0.2
	S-W Sig.	0.468735	0.301009	0.0119234	0.0175719		0.00100951	0.000436286		0.0956459	0.000110114	0.000473212	0.00265825	0.000372796	0.171694	0.258248	0.0291455	0.00681162	0.00701879	0.156873	0.676034	0.23596	0.11449	0.016453	2.24312e-07	0.0128828	0.00683817	0.624234	0.00350411	0.347965	0.00227544	0.000732606	0.015695	0.119518	0.380634	0.0893107	0.0398557	0.017038	0.0078667	0.0625921	0.0463005	0.00954923	0.0582712	0.030227	0.0123426	0.0373178	0.0961423	0.0493554	0.1378
TL2	Minimum	1.3	0.06	0.89	1.37	0.01	0.01	0.01	0.01	0.01	0.04	36.74	0.09	6	2.3	0.2	2.8	1	1.1	0.1	15	0.4	1.1	1.1	8.5	1	0.5	1.4	0.3	0.15	18	20	1.2	0.2	1.3	3.5	5.8	0.56	2	0.3	0.07	0.29	0.04	0.15	0.04	0.12	0.01	0.09	0.02
n=32	Maximum	11.23	0.33	4.13	18.74	0.01	0.03	0.08	0.01	0.05	0.33	59.16	0.33	30	6.5	2.1	12.9	5	5.3	0.7	95	2.4	6.6	6.3	24.3	31	1.7	7.3	1.7	0.35	94	50	6.8	1	6	10.5	22.4	2.25	8.1	1.65	0.3	1.21	0.17	1.08	0.21	0.62	0.1	0.72	0.09
	Mean	4.41187	0.146875	2.035	4.01844	0.01	0.0196875	0.02875	0.01	0.018125	0.124375	52.1681	0.155937	13.25	3.4625	0.6375	4.90625	2.25	2.7	0.384375	40.0312	1.02813	2.49688	2.72188	14.4375	7.28125	0.5625	4.66562	0.71875	0.240313	30.25	25.3125	3.56875	0.45	3.2125	5.975	11.1844	1.135	4.1375	0.729375	0.150312	0.6125	0.08625	0.506563	0.098125	0.292812	0.0425	0.291563	0.0425
	median	3.3	0.13	1.85	2.45	0.01	0.02	0.03	0.01	0.02	0.12	52.86	0.15	13	3.2	0.6	4.2	2	2.6	0.3	35	1	2.2	2.4	13.8	5	0.5	5.1	0.7	0.23	26	20	3.2	0.4	2.9	5.7	9.9	1.02	3.8	0.67	0.14	0.57	0.08	0.45	0.09	0.29	0.04	0.26	0.04
	Skewness	0.87483	1.137	1.07689	2.6474	.	-0.111604	1.46997	.	1.82879	1.56729	-1.70753	2.34779	1.26206	1.45601	2.56024	2.47684	0.975869	0.822476	0.418133	1.37617	1.23806	1.4806	1.31691	0.624752	1.77849	4.35671	-0.245893	1.11332	0.306734	3.29121	1.72086	0.876342	0.859551	1.02567	1.08828	1.35999	1.37692	1.23658	1.48234	0.99265	1.32023	1.21405	1.33316	1.22191	0.988809	1.53373	1.48863	1.30983
	Kurtosis	-0.261654	1.02337	0.940652	6.14496	.	2.04475	2.66742	.	4.79627	4.51541	3.46992	6.90936	2.12995	2.56912	8.69348	8.28399	0.934989	1.7344	-0.772158	1.67695	1.35316	2.38506	1.93568	-0.121778	3.64826	20.2387	-0.46684	1.26964	-0.653107	14.181	2.29328	0.813698	0.0444875	1.42693	0.950132	1.90851	2.08397	1.22686	3.1437	1.14545	1.76977	1.30219	1.86805	1.23998	1.35378	2.98138	3.1561	1.81177
	K-S Sig.	0.0113782	0.134757	0.198383	1.11458e-11		1.16843e-14	2.36017e-05		2.82332e-09	0.0740017	0.000123082	0.000559992	0.2	0.0138971	0.0007698	0.017175	5.13128e-09	0.2	2.1671e-05	0.0748532	0.0716797	0.00591947	0.0259614	0.2	0.00224339	1.31565e-24	0.2	0.0112993	0.2	0.00498803	2.61435e-13	0.2	0.00073491	0.00934175	0.195466	0.000378226	0.00333784	0.00192462	0.0263104	0.126493	0.0156867	0.000123699	0.00864543	0.0022528	0.0305026	0.000199623	0.0377682	3.84626e-05
	S-W Sig.	0.00387934	0.00965722	0.0158339	9.61136e-09		1.49691e-07	0.000300128		1.38797e-06	0.00249251	0.000157942	5.14744e-06	0.00528084	0.0017261	4.6645e-06	9.04681e-06	0.000230681	0.168788	0.0126809	0.00129932	0.00378503	0.000786738	0.00411287	0.212912	5.61051e-05	3.49126e-11	0.50179	0.00912449	0.329834	3.83635e-07	1.87022e-07	0.0727365	0.00447945	0.0162116	0.0112105	0.00172206	0.00185066	0.00090133	0.00274229	0.039329	0.00144965	0.0017542	0.00149606	0.00262228	0.0369271	0.000198594	0.00353266	0.000700527
TL3	Minimum	2.99	0.25	3.45	28.08	0.01	0.01	0.01	0.01	0.02	0.34	3.66	0.02	8	2.8	0.7	7	4	4.2	0.5	58	1	1.8	3.8	16.7	31	0.5	3	1.2	0.1	26	50	4.1	0.6	3.2	7.8	16.4	1.65	5.6	0.88	0.19	0.91	0.12	0.66	0.14	0.43	0.05	0.4	0.05
n=23	Maximum	15.65	0.63	7.65	63.9	0.01	0.02	0.06	0.01	0.05	0.55	29.57	0.15	23	7.4	2	12.5	9	8	1.3	220	5.2	9.4	8.1	37.7	70	3.1	7.1	2.9	0.28	107	90	11.7	1.7	6.9	14.5	28.9	3.09	11.1	1.87	0.37	1.68	0.23	1.52	0.29	0.88	0.16	0.93	0.14
	Mean	6.37478	0.36	4.73348	43.2383	0.01	0.0108696	0.0230435	0.01	0.0308696	0.403478	21.3409	0.0582609	14.5217	4.38261	1.10435	8.94348	5.73913	5.35652	0.878261	96.6522	2.38696	5.52609	5.71304	27.8217	48	1.13913	5.37826	1.83478	0.217391	61.3913	63.913	7.43913	1.03043	5.33913	10.713	20.8522	2.17087	7.57391	1.34	0.299565	1.18304	0.175652	1.01391	0.203913	0.59	0.0956522	0.593043	0.0956522
	median	5.2	0.33	4.68	40.9	0.01	0.01	0.02	0.01	0.03	0.4	24.01	0.06	14	4.3	1	8.7	6	5.2	0.9	78	2	5.1	5.7	28.3	46	0.9	5.5	1.7	0.22	60	60	7.1	1	5.5	10.6	20.3	2.26	7.6	1.4	0.3	1.17	0.18	0.94	0.2	0.58	0.09	0.55	0.09
	Skewness	1.54744	1.45512	1.71067	0.917703	.	3.1404	2.54848	.	1.03702	1.49703	-1.29353	1.11816	0.810358	1.03185	1.56504	1.4662	1.34106	1.45466	-0.183143	1.79379	1.52024	0.548413	0.428486	-0.308369	0.784927	1.49599	-0.323204	1.13491	-0.970574	0.902275	0.787427	0.443409	0.784851	-0.537742	0.461397	0.748359	0.718895	0.769433	-0.0250066	-0.370076	0.797471	0.0693585	0.429805	0.330954	0.805949	0.491545	1.00276	0.229928
	Kurtosis	1.82658	1.69882	4.52982	1.52873	.	8.60544	9.39714	.	1.64952	3.11648	1.30043	3.25992	-0.102614	0.858931	4.05169	2.48118	2.97497	3.16556	-0.651944	2.61436	1.9234	0.534201	-0.352527	0.547706	0.0471207	1.59996	-0.692678	1.45085	0.982373	2.69847	0.204187	0.436918	0.597208	1.85554	0.28145	0.679994	1.44103	2.09971	-0.0414182	0.110989	2.14061	-0.512172	0.0467405	-0.730957	-0.0654329	-0.236458	0.160555	-0.562027
	K-S Sig.	3.70171e-05	0.0032654	0.0884592	0.106211		2.4378e-19	1.51347e-08		5.95757e-09	0.00304677	0.0388068	0.00728021	0.199541	0.2	0.0860307	0.0134182	0.0017032	0.2	0.2	0.000102324	0.00416945	0.133434	0.2	0.2	0.144776	0.0174296	0.2	0.0336058	0.0498096	0.121823	1.65474e-05	0.2	0.147357	0.2	0.19305	0.2	0.167298	0.2	0.192768	0.2	0.2	0.2	0.139054	0.2	0.2	0.2	0.095713	0.2
	S-W Sig.	0.000310175	0.00204576	0.00635091	0.0746535		2.57301e-09	3.68083e-06		9.68129e-05	0.00905819	0.00960276	0.00315885	0.0368198	0.0653662	0.00883247	0.00456497	0.00139306	0.0169124	0.254114	7.15258e-05	0.00129423	0.151657	0.648014	0.896477	0.09646	0.00041115	0.505318	0.0259946	0.0534025	0.0424951	0.00616152	0.909071	0.0567785	0.310988	0.388061	0.305772	0.144706	0.171875	0.531671	0.572997	0.196371	0.644919	0.373751	0.496341	0.08446	0.459208	0.0145335	0.532061
Catchment Materials and References
		SiO2	TiO2	Al2O3	Fe2O3	MnO	MgO	CaO	Na2O	K2O	P2O5	LOI	SO3	Ba	Sr	Rb	Pb	Sc	Th	U	Zr	Hf	Nb	Y	Cu	Zn	C	As	Se	Mo	Hg	V	Cr	Ga	Co	Ni	La	Ce	Pr	Nd	Sm	Eu	Gd	Tb	Dy	Ho	Er	Tm	Yb
Al-Soil	Mean	16.1278	2.68444	13.9444	43.6033	0.03	0.03875	0.02	0.0316667	0.02625	0.863333	22.9489	0.148889	13.7333	5.68889	0.8	18	17.2222	14.4133	3.05667	618.089	16.9444	31.2667	16.6444	41.3333	29.1111	9.15778	2.4	0.755556	1.81667	0.14	262	143.333	37.7111	1.74444	8.71111	17.8333	31.8222	3.72444	13.0444	2.31	0.53	2.20222	0.401111	2.60333	0.586667	1.95222	0.311111	2.25556
n=9	Median	16.74	2.83	14.02	48.45	0.03	0.04	0.02	0.03	0.03	0.72	22.59	0.14	13	5.2	0.8	15	19	12.9	2.9	632	17.6	28.7	15	47.8	25	9.43	2.4	0.6	1.96	0.14	277	160	40.3	0.9	7.8	19.2	26.5	4.16	14	2.41	0.51	2.28	0.4	2.34	0.51	1.66	0.27	1.95
Al-LC	Mean	0.957	1.067	28.193	51.435	0.0766667	0.036	0.044	0.03125	0.33	0.586	17.307	0.069	13.62	7.78	1.72	3.32	20.33	10.632	1.548	198.3	5.22	10.26	5.65	31.52	22.5	0.284	3.8	0.26	1.023	0.103	345.1	227	31.39	0.9	13.5	10.86	20.35	1.969	6.47	1.249	0.305	0.997	0.138	0.983	0.23	0.795	0.143	1.201
n=9	Median	0.71	0.935	26.785	54.37	0.02	0.035	0.03	0.03	0.33	0.555	16.325	0.05	8.35	5.1	0.2	2.65	21.5	8.995	1.355	169.5	4.45	7.85	4.3	20.15	11.5	0.28	3.4	0.2	0.66	0.095	254.5	215	30.4	0.95	6.4	8.9	16.5	1.53	4.75	0.915	0.23	0.665	0.09	0.66	0.19	0.63	0.125	1.145
Fe-LC	Mean	0.759524	0.27619	2.06238	91.5467	0.0273684	0.0852632	0.0333333	0.0325	0.05	0.678095	4.33429	0.0704762	20.8667	13.5952	0.467619	4.67619	4.06667	5.15286	0.65619	74.9571	2.00476	4.64762	3.68571	11.6143	11.619	0.210476	4.24762	0.519048	0.959524	0.0328571	81.8571	44.3333	7.79524	0.952381	2.79048	8.57619	18.1524	1.49952	4.80952	0.838095	0.217619	0.665238	0.0842857	0.54381	0.112857	0.33381	0.0552381	0.338571
n=11	Median	0.66	0.25	1.82	92.27	0.02	0.08	0.02	0.03	0.05	0.66	4.34	0.04	12.2	6.8	0.5	4.3	3.7	4.36	0.6	73	1.9	4.3	3.4	9.6	11	0.19	3.6	0.4	0.92	0.03	59	40	6.8	0.9	1	7.1	16.1	1.36	4.1	0.75	0.19	0.66	0.07	0.51	0.11	0.3	0.05	0.32
Fe-Soil	Mean	3.96667	0.47	2.46	82.475	0.0316667	0.029	0.026		0.031	0.6	10.4867	0.0466667	16.6667	5.9	0.4	11.0833	3.96667	5.21	1.54333	131.217	3.55	7.51667	5.68333	18.8333	20.1667	3.94833	4.53333	0.866667	1.39333	0.0966667	61.3333	83.8333	7.75	1.48333	1.65	5.71667	11.8	1.17167	4.95	0.553333	0.268333	0.686667	0.128333	0.683333	0.185	0.62	0.0883333	0.673333
(n=6)	Median	3.89	0.45	2.15	82.055	0.025	0.025	0.025		0.03	0.61	10.35	0.045	17	6.15	0.4	12.6	3.9	5.05	1.55	131.65	3.45	7.55	5.3	17.9	20.5	3.7	4.95	0.85	1.4	0.105	61.5	84	8.05	1.55	1.6	5.65	12.35	1.18	4.65	0.565	0.23	0.675	0.115	0.675	0.185	0.6	0.085	0.635
BIF	Mean	46.61	0.01	0.05	50.71	0.02	0.07	<0.01	<0.01	<0.01	<0.01			7	0.7	0.8	2.1	1	0.2	0.1	1	0.1	0.1	2.6	11.6	16		0.6	0.5	0.5	0.1	19	34	0.5	0.4	20	1.9	1.5	0.16	0.8	0.09	0.1	0.06	0.01	0.13	0.02	0.06	0.03	0.07
PAAS	Mean	62.8	1	18.9	6.5	0.11	2.2	1.3	1.2	3.7	0.16			580	300	140	20	16	12	3.7	160	2.8	19	27	45	95		13	0.6	2.6	0.4	130	90	19	19	68	38	80	8.9	32	5.6	1.1	4.66	0.77	4.4	1	2.9	0.4	2.8
UCC	Mean	64.92	0.52	14.63	4.42	0.07	2.24	4.12	3.46	3.45	0.15			668	316	110	17	7	10	2.5	237	5.8	26	20.7	14	52		2	0.1	1.4	0.056	53	35	14	12	18.6	30	64	7.1	26	4.5	0.88	3.5	0.64	3.5	0.8	2.3	0.33	2.2
Core lake sediments
R5	Statistic	Al2O3	SiO2	TiO2	CaO	Fe2O3	K2O	MgO	MnO	P2O5	SO3	C	S	LOI	Zr	Hf	Be	Bi	Li	Ga	Ge	Co	Hg	Se	Cd	As	Mo	Cu	Ni	Ba	Pb	Rb	Sc	Sn	U	Th	Zn	Y	Sr	Cr	V	La	Ce	Ho	Dy	Er	Eu	Gd	Lu
	Nbr. of observations	6	6	6	6	6	6	6	6	6	6	6	6	6	6	6	6	6	6	6	6	6	6	6	6	6	6	6	6	6	6	6	6	6	6	6	6	6	6	6	6	6	6	6	6	6	6	6	6
	Minimum	15.79	45.84	2.49	0.01	4.27	0.13	0.06	0.01	0.06	0.03	2.4	0.01	11.81	737	18.7	0.17	0.71	1	33.3	0.11	0.4	0.33	0.7	0.01	0.2	0.19	23	8.4	109	30.6	6.3	12	2.7	5.53	23	6	50.9	23.7	120	207	56.9	113.5	1.7	8.27	4.75	1.46	7.91	0.69
	Maximum	21.31	54.65	3.29	0.18	14.72	0.15	0.19	0.01	0.07	0.26	11.45	0.1	26.74	1130	30.8	1.18	0.86	2.3	42.5	0.27	1.4	0.67	2.2	1.54	0.8	0.96	65.8	14.7	184	41	8.1	18.9	3.5	6.81	26.4	14	65.9	31.3	160	319	99.4	183	2.28	11.25	6.24	1.89	9.4	0.91
	Median	20.19	48.425	2.72	0.06	11.235	0.14	0.135	0.01	0.06	0.06	4.665	0.015	16.435	796.5	21.3	0.225	0.765	1.25	39.1	0.15	0.5	0.53	1.75	0.01	0.5	0.3	39.4	11.9	135.5	37.1	7.05	16.55	2.95	6.115	24.4	9	58.05	24.85	140	240.5	78.75	144.5	2.07	10.125	5.75	1.65	8.71	0.77
	Mean	19.6183	48.985	2.825	0.0766667	9.99333	0.141667	0.131667	0.01	0.0633333	0.1	6.00667	0.03	18.385	846	22.6333	0.401667	0.768333	1.38333	39.0167	0.166667	0.65	0.518333	1.6	0.266667	0.516667	0.385	43.2	11.75	138.167	35.9667	7.13333	16.0833	3.03333	6.22833	24.55	9.83333	57.9	26.1667	141.667	245.5	78.5167	145.75	2.03	9.88833	5.6	1.67167	8.68	0.781667
	Standard deviation (n)	1.85965	2.92224	0.281943	0.0626276	4.40402	0.00687184	0.0466964	0	0.00471405	0.0856349	3.696	0.0321455	5.5454	138.629	4.24683	0.359973	0.0474049	0.429793	3.12859	0.0521749	0.340343	0.103829	0.465475	0.569464	0.203443	0.260944	16.5318	2.25	22.9486	3.88015	0.590668	2.16596	0.256038	0.431409	1.02916	3.13138	5.10588	2.89002	14.6249	37.5267	13.7105	20.9459	0.222336	1.04815	0.569064	0.182612	0.58112	0.0724377
	Skewness (Fisher)	-1.68658	1.23471	0.712633	0.6295	-0.336561	-0.31257	-0.278916		0.968246	1.19271	0.569311	2.18482	0.553338	1.66029	1.24019	2.13043	1.10638	1.96747	-0.804349	1.40685	2.29242	-0.620539	-1.14049	2.44926	-0.147563	2.28746	0.262561	-0.183927	1.30571	-0.390291	0.368161	-0.980026	0.876235	-0.0895449	0.53702	0.47899	0.15126	1.00584	0.0405317	1.26963	-0.0779538	0.431933	-0.334888	-0.441851	-0.449508	0.100833	-0.112499	0.727442
	Kurtosis (Fisher)	3.037	1.49726	-1.04307	-1.29074	-2.51723	-0.103806	-1.48976		-1.875	0.442304	-2.06217	4.90375	-1.72771	2.81192	1.14445	4.60043	1.87124	4.22493	0.597506	2.05364	5.41018	1.27722	1.93669	5.99913	-1.12833	5.42258	-2.30501	-1.86886	2.80155	-1.78569	-0.494822	1.38315	0.670066	-0.473086	1.36883	-1.77989	-0.91408	-0.43239	-1.31051	1.84262	-0.440084	1.39052	-2.16086	-1.31789	-1.99301	-2.88459	-1.83563	0.141033
LB1	Statistic	Al2O3	SiO2	TiO2	CaO	Fe2O3	K2O	MgO	MnO	P2O5	SO3	C	S	LOI	Zr	Hf	Be	Bi	Li	Ga	Ge	Co	Hg	Se	Cd	As	Mo	Cu	Ni	Ba	Pb	Rb	Sc	Sn	U	Th	Zn	Y	Sr	Cr	V	La	Ce	Ho	Dy	Er	Eu	Gd	Lu
	Nbr. of observations	5	5	5	5	5	5	5	5	5	5	5	5	5	5	5	5	5	5	5	5	5	5	5	5	5	5	5	5	5	5	5	5	5	5	5	5	5	5	5	5	5	5	5	5	5	5	5	5
	Minimum	23.11	37.19	3.12	0.02	4.85	0.08	0.02	0.01	1.18	0.27	3.5	0.1	18.56	679	18.8	0.25	0.41	0.4	43.1	0.16	0.4	0.06	0.6	0.01	0.5	1.64	67.9	4.5	26.1	15.5	2.6	17	3.4	3.7	24.4	21	20.2	5.6	240	203	13.2	31.4	0.75	3.33	2.48	0.76	2.95	0.51
	Maximum	27.73	43.79	3.73	0.03	10.8	0.09	0.06	0.01	1.64	0.3	8.03	0.12	26.4	744	21.5	0.42	0.51	0.6	53	0.23	0.5	0.08	0.8	0.03	0.8	3.04	92.5	5.8	33.4	16.8	2.8	22.6	4.9	4.61	30	47	26.3	6.3	300	373	23.2	52.1	0.95	4.2	2.99	0.99	4.27	0.66
	Median	25.84	39.79	3.43	0.03	8.26	0.08	0.03	0.01	1.33	0.28	4.12	0.11	20.43	698	19.9	0.4	0.48	0.5	49	0.22	0.4	0.07	0.7	0.02	0.7	2.51	73	5.4	29.2	16.3	2.6	21.8	4.2	4	27.2	33	21.8	6.1	300	336	15.3	37.3	0.85	3.79	2.81	0.93	3.65	0.57
	Mean	25.518	39.774	3.4	0.026	7.75	0.082	0.038	0.01	1.388	0.282	5.026	0.11	21.566	710.6	19.92	0.364	0.468	0.52	48.6	0.202	0.44	0.072	0.7	0.02	0.68	2.376	76.76	5.26	29.68	16.3	2.68	20.5	4.12	4.096	27.14	33.6	22.82	6.06	282	303.2	17.48	41.68	0.852	3.786	2.746	0.886	3.65	0.58
	Standard deviation (n)	1.76156	2.36164	0.236474	0.00489898	2.48561	0.004	0.0146969	0	0.171278	0.00979796	1.67292	0.00632456	2.68688	26.0354	0.955824	0.065909	0.0411825	0.0748331	3.87866	0.0305941	0.0489898	0.00748331	0.0632456	0.00894427	0.116619	0.542756	8.80423	0.440908	2.51984	0.460435	0.0979796	2.09762	0.630555	0.337911	2.39633	10.9836	2.33444	0.241661	24	69.5454	3.80284	8.38985	0.0830422	0.340153	0.177381	0.0930806	0.473835	0.0493964
	Skewness (Fisher)	-0.218019	0.860119	0.0744024	-0.608581	-0.165594	2.23607	0.518421		0.449482	1.29323	1.35911	-1.12302e-15	1.26038	0.357467	0.697481	-1.16937	-0.427201	-0.512241	-0.278856	-0.5947	0.608581	-0.512241	2.04439e-15	-2.64698e-16	-0.541387	-0.274743	1.28668	-0.935828	0.148064	-0.989612	0.608581	-0.997198	-0.0907596	0.526797	-0.0149445	0.0733867	0.581956	-1.70355	-1.25779	-0.585143	0.631681	0.341564	0.00524793	-0.09496	-0.290596	-0.469456	-0.210589	0.415574
	Kurtosis (Fisher)	-2.28491	0.385786	-2.18031	-3.33333	-2.83771	5	-1.68724		-1.87324	2.91667	1.16457	2	1.72054	-2.75342	-0.0653139	0.121995	-2.53604	-0.612245	-2.25208	-2.98269	-3.33333	-0.612245	2	-3	-1.48789	-2.45472	1.22246	0.954631	-0.694108	0.860805	-3.33333	-0.600645	-2.83403	-1.5916	-2.94244	-2.91864	-2.04122	3.37211	0.3125	-2.55131	-1.97919	-2.78218	-2.85795	-2.45836	-0.832559	-2.80234	-1.33086	0.774523
LB2	Statistic	Al2O3	SiO2	TiO2	CaO	Fe2O3	K2O	MgO	MnO	P2O5	SO3	C	S	LOI	Zr	Hf	Be	Bi	Li	Ga	Ge	Co	Hg	Se	Cd	As	Mo	Cu	Ni	Ba	Pb	Rb	Sc	Sn	U	Th	Zn	Y	Sr	Cr	V	La	Ce	Ho	Dy	Er	Eu	Gd	Lu
	Nbr. of observations	14	14	14	14	14	14	14	14	14	14	14	14	14	14	14	14	14	14	14	14	14	14	14	14	14	14	14	14	14	14	14	14	14	14	14	14	14	14	14	14	14	14	14	14	14	14	14	14
	Minimum	22.68	16.63	3.17	0.02	3.36	0.06	0.03	0.01	0.95	0.03	1.63	0.01	14.66	665	18.6	0.19	0.46	0.4	42.1	0.09	0.3	0.06	0.4	0.01	0.3	0.74	45.5	4.1	23.2	11.4	2.3	10.1	4	3.86	28.2	11	19.5	4.5	180	161	8.6	20.2	0.72	3.15	2.62	0.65	2.39	0.53
	Maximum	31.05	46.53	4.51	0.02	26.28	0.09	0.09	0.01	1.49	0.15	11.4	0.05	30.94	900	24.9	0.52	0.67	1.2	63.4	0.25	1.3	0.17	1.2	0.03	1.2	3.93	95.8	12.9	45.1	19.2	3.5	23.6	6.4	5.69	38.6	27	36	10.4	310	414	48.2	87.5	1.34	6.02	4.36	1.41	5.74	0.8
	Median	28.46	38.8	3.985	0.02	7.99	0.08	0.055	0.01	1.26	0.045	2.63	0.01	17.46	785	21.9	0.395	0.585	0.6	51.65	0.14	0.5	0.11	0.6	0.01	0.65	1.8	73.55	5.4	30.7	17.35	2.6	19.55	5.5	4.765	34.35	19	26.5	5.5	250	334.5	22.3	49.95	0.995	4.365	3.34	1.015	4.185	0.67
	Mean	27.8421	36.1907	3.89	0.02	11.3164	0.0771429	0.055	0.01	1.21286	0.0635714	3.41786	0.0214286	18.3529	773.571	21.5143	0.385714	0.567857	0.614286	52.2929	0.152857	0.564286	0.112857	0.628571	0.0128571	0.65	1.94643	72.3643	6.02857	30.4786	16.3357	2.58571	19.05	5.32143	4.81143	33.7643	18	27.5214	5.78571	251.429	320.286	24.7357	51.4286	1.00214	4.54	3.32143	1.02857	4.11857	0.659286
	Standard deviation (n)	2.20657	9.50458	0.435349	0	8.04589	0.00699854	0.0140153	0	0.177097	0.0388416	2.43742	0.0145686	4.01656	72.4043	1.81023	0.0913951	0.0671011	0.176705	7.12335	0.0554757	0.274141	0.0298636	0.201525	0.00589015	0.244219	0.964362	16.1384	2.08855	4.9317	2.34661	0.289968	3.13955	0.734048	0.512304	3.25809	4.65986	5.50872	1.3804	34.6115	67.8101	12.7919	22.4965	0.179052	0.868225	0.522547	0.238083	1.02781	0.081894
	Skewness (Fisher)	-0.858176	-0.8422	-0.359028		0.803162	-0.889243	0.700053		-0.0808165	1.28274	2.77679	0.810897	2.37168	-0.159504	-0.0226909	-0.64956	-0.263034	2.72487	0.153924	0.533546	1.59169	0.303477	1.61832	2.16528	0.595405	0.704529	-0.144983	2.73354	1.60378	-1.09019	2.29398	-1.53086	-0.469414	0.00805468	-0.340826	0.276177	0.0427017	2.86523	-0.274854	-0.766575	0.450704	0.183925	0.143073	0.149675	0.376115	0.0389689	0.0287707	-0.0119592
	Kurtosis (Fisher)	0.57663	-0.491623	-1.02685		-0.907949	1.52959	1.76198		-1.56372	0.653169	8.45747	-1.11172	6.63727	-1.05929	-0.746533	-0.234765	-0.983137	9.18609	-1.17844	-1.16124	2.40963	-0.373373	3.51352	4.25087	-0.0414435	-0.484306	-1.21201	8.68701	5.17915	-0.0937388	6.86605	3.92635	-0.686057	-0.690793	-1.06622	-0.673827	-1.55224	9.48337	-0.108256	0.683326	-1.01772	-1.3106	-0.975411	-1.11173	-0.645571	-1.40517	-1.11527	-0.91006
LB3	Statistic	Al2O3	SiO2	TiO2	CaO	Fe2O3	K2O	MgO	MnO	P2O5	SO3	C	S	LOI	Zr	Hf	Be	Bi	Li	Ga	Ge	Co	Hg	Se	Cd	As	Mo	Cu	Ni	Ba	Pb	Rb	Sc	Sn	U	Th	Zn	Y	Sr	Cr	V	La	Ce	Ho	Dy	Er	Eu	Gd	Lu
	Nbr. of observations	22	22	22	22	22	22	22	22	22	22	22	22	22	22	22	22	22	22	22	22	22	22	22	22	22	22	22	22	22	22	22	22	22	22	22	22	22	22	22	22	22	22	22	22	22	22	22	22
	Minimum	15.86	12.56	3.52	0.01	6.29	0.01	0.02	0.01	0.15	0.01	0.61	0.01	10.59	934	24.5	0.15	0.28	0.3	28.2	0.05	0.7	0.02	0.1	0.01	0.1	1.01	45.2	3.1	89.1	4	0.8	11.7	2.7	4.42	24.8	39	28	21.3	180	219	36.3	68.2	1	4.59	3.53	1.08	4.58	0.76
	Maximum	49.4	53.24	5.58	0.05	21.79	0.26	0.14	0.03	2.4	0.11	4.77	0.03	17.22	1240	31.7	0.76	0.78	3.5	110.5	0.22	8.1	0.79	0.5	0.33	0.5	2.17	133.5	24.2	266	17.1	9.5	31.1	9.1	6.23	64.1	116	49.2	68.3	450	636	72.2	112	1.68	7.66	5.4	1.79	6.62	0.99
	Median	34.695	36.6	5	0.02	8.665	0.1	0.07	0.015	0.555	0.03	1.4	0.01	14.075	1080	27.05	0.4	0.68	1.95	65.5	0.14	3	0.06	0.2	0.045	0.2	1.56	73.6	17.1	217	12.25	5.6	23.2	6.35	5.625	43.35	62	36.65	46.45	300	388.5	45.4	80.45	1.27	5.9	4.2	1.37	5.5	0.85
	Mean	31.6277	37.2832	4.73273	0.0218182	11.0805	0.129545	0.0822727	0.0172727	0.737727	0.04	1.67364	0.0122727	14.2555	1089.73	27.4409	0.423182	0.585909	1.98636	62.4455	0.14	3.65909	0.108636	0.240909	0.0640909	0.218182	1.61	78.8273	16.2136	200.8	12.0136	5.6	21.7409	5.71364	5.43955	40.5636	70.6364	36.9455	44.9136	300.909	402.318	47.7091	83.4727	1.29727	5.96091	4.25364	1.38909	5.58864	0.859545
	Standard deviation (n)	9.85431	10.7659	0.702264	0.00833196	4.72507	0.0700959	0.0356666	0.00808018	0.626686	0.0324738	0.953322	0.00516264	1.87303	69.8161	1.74972	0.146144	0.175179	0.837364	24.1699	0.0429588	2.00673	0.158237	0.107277	0.0708172	0.115351	0.339639	22.4995	5.63667	52.3795	3.62884	2.14455	5.72615	1.96221	0.479597	11.0026	24.0804	5.00488	15.2961	76.9243	117.472	9.57506	11.6163	0.158722	0.702463	0.473205	0.173727	0.541717	0.0647707
	Skewness (Fisher)	-0.0304981	-0.798655	-0.630824	1.65002	1.07551	0.186716	0.238941	0.57396	1.2976	0.770307	1.61401	2.39418	-0.382556	0.0537336	0.882659	0.143062	-0.589507	-0.401516	0.370648	-0.107217	0.980278	3.90722	0.728917	2.69914	0.760712	-0.016264	0.669236	-0.836663	-0.764641	-0.740003	-0.615894	-0.409029	-0.140365	-0.534573	0.264465	0.763416	0.610057	-0.267036	0.419933	0.542947	1.42641	0.963978	0.603111	0.354789	0.677213	0.375458	0.346349	0.47764
	Kurtosis (Fisher)	-0.894448	0.386605	-1.15674	4.99859	0.0544643	-0.986593	-1.10223	-1.28183	1.23134	-0.655338	3.57571	5.45933	-0.783567	-0.0804137	0.64701	-0.0806522	-1.48019	-0.0100834	-0.469983	0.168105	0.409315	16.4494	0.0439371	8.50306	-0.127297	-1.07951	-0.231204	0.368188	-0.634566	-0.0458426	0.337027	-0.981568	-1.14234	-0.798965	-0.458516	-0.915249	1.02168	-1.39899	-0.47285	-0.436532	1.57119	0.233388	1.06017	0.479667	0.264394	-0.0768602	-0.316003	-0.494012
LB4	Statistic	Al2O3	SiO2	TiO2	CaO	Fe2O3	K2O	MgO	MnO	P2O5	SO3	C	S	LOI	Zr	Hf	Be	Bi	Li	Ga	Ge	Co	Hg	Se	Cd	As	Mo	Cu	Ni	Ba	Pb	Rb	Sc	Sn	U	Th	Zn	Y	Sr	Cr	V	La	Ce	Ho	Dy	Er	Eu	Gd	Lu
	Nbr. of observations	3	3	3	3	3	3	3	3	3	3	3	3	3	3	3	3	3	3	3	3	3	3	3	3	3	3	3	3	3	3	3	3	3	3	3	3	3	3	3	3	3	3	3	3	3	3	3	3
	Minimum	15.56	38.15	2.93	0.02	3.88	0.28	0.11	0.02	0.05	0.07	7.43	0.02	19.83	742	20.7	0.3	0.34	1.4	28.5	0.05	1.2	0.04	0.4	0.03	0.2	0.57	53.7	17.4	185	11.2	10.3	12.6	2.4	4.14	22.6	8	31.3	20.5	290	274	38.8	74.1	1.27	5.88	3.98	1.28	5.5	0.7
	Maximum	22.23	49.63	4.01	0.04	19.37	0.32	0.12	0.05	0.09	0.19	9	0.07	23.58	1010	25	0.55	0.46	2	40.4	0.1	4.8	0.08	0.4	0.11	0.7	1.95	74.8	17.5	222	14.3	12.8	15.1	2.9	5.13	30	35	39.5	26.4	400	369	45.7	81.9	1.41	6.45	4.78	1.34	5.98	0.82
	Median	21.57	49.18	3.78	0.02	4.12	0.31	0.11	0.03	0.06	0.1	8.34	0.03	21.28	1000	24.8	0.49	0.45	1.6	38.3	0.06	1.3	0.08	0.4	0.04	0.3	0.67	54.8	17.5	219	13.9	12.8	13.6	2.9	5.04	29.5	30	38.6	25.9	390	366	45.2	79.6	1.36	6.39	4.54	1.3	5.66	0.79
	Mean	19.7867	45.6533	3.57333	0.0266667	9.12333	0.303333	0.113333	0.0333333	0.0666667	0.12	8.25667	0.04	21.5633	917.333	23.5	0.446667	0.416667	1.66667	35.7333	0.07	2.43333	0.0666667	0.4	0.06	0.4	1.06333	61.1	17.4667	208.667	13.1333	11.9667	13.7667	2.73333	4.77	27.3667	24.3333	36.4667	24.2667	360	336.333	43.2333	78.5333	1.34667	6.24	4.43333	1.30667	5.71333	0.77
	Standard deviation (n)	3.00083	5.30884	0.464495	0.00942809	7.24615	0.0169967	0.00471405	0.0124722	0.0169967	0.0509902	0.643653	0.0216025	1.54398	124.047	1.98158	0.106562	0.054365	0.249444	5.18609	0.0216025	1.67398	0.0188562	0	0.0355903	0.216025	0.628296	9.69777	0.0471405	16.7796	1.37679	1.17851	1.0274	0.235702	0.44699	3.37672	11.7284	3.67181	2.67125	49.6655	44.0933	3.14148	3.27244	0.0579272	0.255734	0.335195	0.0249444	0.199555	0.0509902
	Skewness (Fisher)	-1.66942	-1.72272	-1.41902	1.73205	1.73063	-1.29334	1.73205	0.93522	1.29334	1.29334	-0.470385	1.45786	0.659114	-1.72361	-1.71883	-1.3294	-1.6882	0.93522	-1.52149	1.45786	1.72742	-1.73205		1.63006	1.45786	1.6992	1.71535	-1.73205	-1.69062	-1.62305	-1.73205	0.585583	-1.73205	-1.67954	-1.70361	-1.49896	-1.65433	-1.68665	-1.67954	-1.72604	-1.6992	-1.1128	-0.815843	-1.66082	-1.09029	0.93522	0.93522	-1.29334
LSL	Statistic	Al2O3	SiO2	TiO2	CaO	Fe2O3	K2O	MgO	MnO	P2O5	SO3	C	S	LOI	Zr	Hf	Be	Bi	Li	Ga	Ge	Co	Hg	Se	Cd	As	Mo	Cu	Ni	Ba	Pb	Rb	Sc	Sn	U	Th	Zn	Y	Sr	Cr	V	La	Ce	Ho	Dy	Er	Eu	Gd	Lu
	Nbr. of observations	7	7	7	7	7	7	7	7	7	7	7	7	7	7	7	7	7	7	7	7	7	7	7	7	7	7	7	7	7	7	7	7	7	7	7	7	7	7	7	7	7	7	7	7	7	7	7	7
	Minimum	15.1	36.81	2.13	0.02	3.53	0.05	0.01	0.01	1.22	0.46	9.8	0.35	25.34	355	9.6	0.26	0.53	0.3	37.3	0.05	0.4	0.33	1.6	0.02	1.2	1.06	70.1	5.4	37.9	20.6	2	7.6	4	4.13	14	50	26.3	12.4	260	185	30	50.4	0.94	4.3	2.69	1	4.02	0.44
	Maximum	17.68	50.65	2.5	0.03	5.98	0.06	0.03	0.01	1.34	1.51	18.2	0.88	38.34	468	12.6	0.6	0.62	0.5	47.7	0.11	1	0.41	6.1	0.15	3.8	1.75	113	10.9	87.8	22	2.8	17.2	4.6	5.88	18.95	102	35.8	15.2	370	256	43	73.2	1.34	6.19	3.77	1.44	5.99	0.6
	Median	16.24	49.26	2.22	0.02	4.16	0.05	0.03	0.01	1.29	0.9	10.3	0.6	26.02	366	10	0.49	0.56	0.4	39.4	0.08	0.5	0.39	2.2	0.05	2.3	1.31	88.3	6.7	47.3	21.8	2.3	13.6	4.4	4.56	15.25	69	28.8	13.4	310	204	35.2	59.8	1.06	4.95	3.07	1.2	4.65	0.48
	Mean	16.3	47.1229	2.28429	0.0242857	4.24286	0.0528571	0.0228571	0.01	1.27714	0.928571	12.0714	0.598571	28.6886	390	10.6714	0.448571	0.571429	0.414286	40.6571	0.0785714	0.585714	0.38	2.78571	0.06	2.24286	1.31143	90.6429	7.67143	54.5429	21.5714	2.31429	12.9429	4.35714	4.70714	15.6857	70.2857	29.2	13.6714	307.143	207.286	35.3714	60.1	1.08	4.94714	3.12571	1.18714	4.75571	0.49
	Standard deviation (n)	1.01239	4.59376	0.149939	0.00494872	0.781331	0.00451754	0.00880631	0	0.0465109	0.384352	2.86242	0.189618	4.45002	38.9652	1.07665	0.12586	0.0335638	0.0832993	3.17799	0.0216654	0.216654	0.0244949	1.4535	0.04	0.91785	0.213503	17.0196	1.97246	18.9332	0.483187	0.247436	3.67029	0.191663	0.572007	1.60128	17.958	2.97033	0.973527	39.1752	22.6761	4.57531	8.11348	0.120949	0.582819	0.301987	0.138122	0.592063	0.0489898
	Skewness (Fisher)	0.0712621	-1.94045	0.558376	0.374166	1.73338	1.22963	-0.763587		0.0256893	0.266548	1.65995	0.194505	1.71616	1.18805	0.788357	-0.367198	0.162505	-0.353045	1.70514	-0.0891814	1.11254	-1.13389	2.01249	1.82271	0.544601	1.03849	0.212523	0.63739	1.08	-1.40791	0.960858	-0.331756	-0.772873	1.23053	1.21377	0.661805	1.70755	0.478594	0.204022	1.48591	0.500457	0.432694	1.45175	1.38103	1.22844	0.550415	1.23322	1.78588
	Kurtosis (Fisher)	-2.21469	3.56416	-1.85186	-2.8	3.44686	-0.84	-1.68698		-2.15751	-1.83736	2.20923	-1.71077	2.54818	0.693566	-0.934962	-1.78617	-1.66531	-1.81661	3.42141	-1.44467	0.0759017	1.51429	4.13425	3.8625	-1.05384	1.9268	-1.95562	-1.3613	-0.667435	0.889797	0.90048	-1.81128	-0.0124444	1.37697	1.28136	-0.710146	3.51748	-1.09976	-1.40115	2.49827	-1.18734	-1.33221	2.6729	2.46411	3.20274	0.0645461	2.05944	3.85
R1	Statistic	Al2O3	SiO2	TiO2	CaO	Fe2O3	K2O	MgO	MnO	P2O5	TOC	TS	LOI	Zr	Hf	Ga	Co	Hg	Se	As	Mo	Cu	Ni	Ba	Pb	Rb	Sc	U	Th	Zn	Y	Sr	Cr	V	La	Ce	Ho	Dy	Er	Eu	Gd	Lu	Nb	Nd	Pr	Tm	Sm	Tb	Yb
	Nbr. of observations	3	3	3	3	3	3	3	3	3	3	3	3	3	3	3	3	3	3	3	3	3	3	3	3	3	3	3	3	3	3	3	3	3	3	3	3	3	3	3	3	3	3	3	3	3	3	3	3
	Minimum	16.59	32.23	1.36	0.01	8.73	0.18	0.08	0.01	0.11	3.81	0.09	20.2	357.7	8.5	25.8	2.5	0.03	2.5	0.5	0.7	25.8	4.2	109	27.8	9.8	13	3.3	17.4	27	20.9	21.7	150	113	35.8	69.4	0.8	3.78	2.23	0.95	3.84	0.37	27	24	6.78	0.38	4.14	0.63	2.25
	Maximum	22.29	45.41	2.56	0.03	28.39	0.28	0.14	0.02	0.22	15.4	0.43	34	545.3	14.9	41.7	12	0.4	4.8	0.5	1.3	61.5	35.9	183	38.9	14	18	5.3	27.3	89	28.8	28.9	200	173	42.4	83.6	1.05	4.61	3.14	1.11	4.52	0.52	48.1	24.6	7.7	0.51	4.75	0.75	3.36
	Median	18.77	33.77	1.55	0.01	11.25	0.2	0.11	0.01	0.15	4.33	0.21	20.7	373.2	10.7	31.5	3.8	0.16	2.5	0.5	0.8	54.4	14.3	181	28.1	11.6	14	3.7	19.9	73	21.8	27.5	150	120	39.2	78.9	0.81	4.31	2.41	1.02	3.93	0.37	33.6	24	7.58	0.38	4.39	0.64	2.41
	Mean	19.2167	37.1367	1.82333	0.0166667	16.1233	0.22	0.11	0.0133333	0.16	7.84667	0.243333	24.9667	425.4	11.3667	33	6.1	0.196667	3.26667	0.5	0.933333	47.2333	18.1333	157.667	31.6	11.8	15	4.1	21.5333	63	23.8333	26.0333	166.667	135.333	39.1333	77.3	0.886667	4.23333	2.59333	1.02667	4.09667	0.42	36.2333	24.2	7.35333	0.423333	4.42667	0.673333	2.67333
	Standard deviation (n)	2.34835	5.88382	0.526646	0.00942809	8.73464	0.0432049	0.0244949	0.00471405	0.0454606	5.34523	0.140791	6.39079	85.0179	2.65497	6.57723	4.20555	0.153261	1.08423	0	0.262467	15.4303	13.2223	34.4222	5.16333	1.72047	2.16025	0.864099	4.20344	26.2805	3.53113	3.11698	23.5702	26.7872	2.69485	5.90649	0.115566	0.343155	0.393475	0.0654896	0.301588	0.0707107	8.813	0.282843	0.408357	0.0612826	0.250377	0.054365	0.489921
	Skewness (Fisher)	0.682	1.64348	1.56451	1.73205	1.62455	1.45786	5.64689e-16	1.73205	0.782152	1.71976	0.837393	1.7241	1.68897	0.883823	0.808889	1.60875	0.845494	1.73205		1.54539	-1.46109	1.00553	-1.72767	1.72767	0.423273	1.45786	1.45786	1.28399	-1.26313	1.64804	-1.47369	1.73205	1.64376	-0.0908581	-0.946616	1.72233	-0.793569	1.46418	0.371443	1.61708	1.73205	1.03252	1.73205	-1.62055	1.73205	0.530382	1.6882	1.59453
R2	Statistic	Al2O3	SiO2	TiO2	CaO	Fe2O3	K2O	MgO	MnO	P2O5	TOC	TS	LOI	Zr	Hf	Ga	Co	Hg	Se	As	Mo	Cu	Ni	Ba	Pb	Rb	Sc	U	Th	Zn	Y	Sr	Cr	V	La	Ce	Ho	Dy	Er	Eu	Gd	Lu	Nb	Nd	Pr	Tm	Sm	Tb	Yb
	Nbr. of observations	4	4	4	4	4	4	4	4	4	4	4	4	4	4	4	4	4	4	4	4	4	4	4	4	4	4	4	4	4	4	4	4	4	4	4	4	4	4	4	4	4	4	4	4	4	4	4	4
	Minimum	11.6	44.01	2.23	0.01	6.19	0.06	0.05	0.01	0.03	0.93	0.02	11.3	433	10.7	20.1	1.6	0.04	0.5	0.5	0.1	30.7	2.5	34	15	2.1	15	5.1	16.4	4	26.4	13.1	170	123	35.5	60.2	0.96	4.36	2.83	0.95	3.84	0.52	30.8	21.1	6.54	0.47	3.91	0.66	3.14
	Maximum	26.7	47.91	2.75	0.03	26.77	0.22	0.12	0.01	0.12	2.53	0.3	18	773	21	44.7	8.8	9.21	14	1.1	1.3	180.1	30.2	319	54.9	14.3	29	7.5	25.2	81	39.9	22.7	260	317	82.1	140	1.54	7.12	4.18	2.01	7.58	0.7	38.6	48.7	14.37	0.66	8.93	1.23	4.36
	Median	24.065	47.425	2.475	0.01	9.295	0.17	0.095	0.01	0.075	1.595	0.035	16.8	481.15	13.2	41.5	1.95	0.155	3.05	0.5	0.5	95.9	13.7	220	37.45	9.2	24.5	5.45	20.95	6	34.95	18.95	235	235.5	59.95	102.15	1.115	5.295	3.435	1.17	4.825	0.605	33.4	34.3	10.26	0.565	5.17	0.795	3.46
	Mean	21.6075	46.6925	2.4825	0.015	12.8875	0.155	0.09	0.01	0.075	1.6625	0.0975	15.725	542.075	14.525	36.95	3.575	2.39	5.15	0.65	0.6	100.65	15.025	198.25	36.2	8.7	23.25	5.875	20.875	24.25	34.05	18.425	225	227.75	59.375	101.125	1.1825	5.5175	3.47	1.325	5.2675	0.6075	34.05	34.6	10.3575	0.565	5.795	0.87	3.605
	Standard deviation (n)	5.87736	1.57716	0.188066	0.00866025	8.27815	0.0589491	0.0254951	0	0.0320156	0.625435	0.117127	2.64799	135.555	3.88096	9.93818	3.02024	3.93781	5.39375	0.259808	0.484768	53.1713	11.4224	122.655	14.229	4.3566	5.11737	0.954921	3.37593	32.8053	4.85824	3.45643	35	69.0991	19.8161	36.5598	0.216145	1.01031	0.490968	0.425059	1.43936	0.0746241	2.83417	12.3513	3.56336	0.0743303	2.00037	0.215058	0.505099
	Skewness (Fisher)	-1.79246	-1.79648	0.189168	2	1.65395	-1.19854	-0.940661		-3.57656e-16	0.363266	1.97816	-1.6144	1.80945	1.55664	-1.76373	1.98564	1.99914	1.45198	2	0.615763	0.4557	0.291538	-0.351262	-0.444379	-0.580643	-1.1814	1.79747	-0.0807151	1.98532	-0.928646	-0.751056	-1.09074	-0.572986	-0.0578042	-0.0279504	1.45664	1.04622	0.33162	1.30306	1.24983	0.0793216	1.12754	0.0314167	0.029551	0	1.0911	1.59075	0.806862
	Kurtosis (Fisher)	3.43273	3.23134	0.297789	4	2.62066	1.9794	1.5		1.13861	-2.50759	3.92734	2.52216	3.3382	2.8638	3.0926	3.95381	3.99716	1.72153	4	-2.30263	1.4656	-3.84718	-3.99636	1.33752	1.5	2.18092	3.29617	-2.31855	3.94881	1.97447	1.46785	0.297376	1.62245	-4.87242	-5.70036	2.68385	1.65331	0.162727	1.00572	1.15842	-4.40912	2.20905	-5.51758	-5.65355	-2.99023	0.0302481	2.98439	-1.53704
R4	Statistic	Al2O3	SiO2	TiO2	CaO	Fe2O3	K2O	MgO	MnO	P2O5	TOC	TS	Zr	Hf	Ga	Co	Hg	Se	Cd	As	Mo	Cu	Ni	Ba	Pb	Rb	Sn	U	Th	Zn	Y	Sr	Cr	V	La	Ce	Ho	Dy	Er	Eu	Gd	Lu	Nb	Nd	Pr	Tm	Sm	Tb
	Nbr. of observations	5	5	5	5	5	5	5	5	5	5	5	5	5	5	5	5	5	5	5	5	5	5	5	5	5	5	5	5	5	5	5	5	5	5	5	5	5	5	5	5	5	5	5	5	5	5	5
	Minimum	10.64	23.1	2.13	0.01	29.39	0.03	0.02	0.01	0.72	2.56	0.04	565.9	14.6	26.1	0.8	0.01	1.1	1.1	2.2	58.6	8.3	25	25.2	1.2	12	3.5	15.5	9	24.2	4.2	90	191	31.1	54.2	0.85	4.14	2.64	0.83	3.77	0.5	32.3	19.7	5.45	0.42	3.73	0.64	2.9
	Maximum	13.56	32.99	2.38	0.02	43.45	0.06	0.04	0.02	0.88	5.64	0.08	636.5	16.7	32.9	1.8	0.08	1.7	2	3.4	73.1	14.6	56	27.9	2.2	14	4.3	18.1	14	27	7.2	90	234	47	83.8	1.01	4.58	3.23	1.08	4.93	0.53	35.7	30.3	8.19	0.51	5.09	0.77	3.22
	Median	11.82	30.63	2.28	0.01	36.47	0.05	0.02	0.02	0.73	3.69	0.05	592.1	16	28.1	1.2	0.03	1.7	1.5	2.9	67.3	9.8	28	27	1.6	12	3.7	16	13	24.8	5	90	203	35.7	63.3	0.95	4.26	2.79	0.85	3.86	0.51	34.5	21.8	6.19	0.46	4	0.67	3.07
	Mean	11.934	28.916	2.284	0.014	36.922	0.05	0.024	0.018	0.76	4.146	0.054	602.86	15.82	29.5	1.2	0.038	1.56	1.54	2.88	66.2	10.26	33	26.8	1.62	12.6	3.8	16.54	12	25.24	5.22	90	210.2	37.3	64.8	0.944	4.31	2.858	0.904	4.072	0.512	34.32	23.02	6.436	0.458	4.158	0.68	3.07
	Standard deviation (n)	1.13634	3.44321	0.0904655	0.00489898	5.08008	0.0109545	0.008	0.004	0.0609918	1.17563	0.0149666	26.2382	0.724983	2.77705	0.334664	0.0278568	0.233238	0.361109	0.396989	4.8818	2.29574	11.6276	0.883176	0.337046	0.8	0.282843	0.993177	2.09762	0.991161	1.05148	0	17.5203	5.88252	10.1908	0.062482	0.149399	0.204294	0.0954149	0.434576	0.0116619	1.14263	3.73813	0.92342	0.0318748	0.482303	0.0477493	0.101784
	Skewness (Fisher)	0.292805	-0.904394	-0.863924	0.608581	-0.196364	-1.36083	2.23607	-2.23607	2.06567	0.142256	1.08851	0.0402964	-0.822106	0.336779	1.14541	0.556098	-2.09224	0.123085	-0.779983	-0.298934	1.66782	2.11652	-1.18153	0.863395	1.25779	1.18585	0.775383	-0.581456	1.2328	1.62016		0.452261	0.828375	1.51478	-0.416248	1.26603	1.35606	1.54499	2.09887	0.541387	-1.06016	1.93941	1.65581	0.603194	1.86852	1.64313	-0.432589
	Kurtosis (Fisher)	-2.16963	0.229026	0.389832	-3.33333	-1.35814	2	5	5	4.33091	-2.21811	0.535714	-1.84216	0.339095	-2.80166	2	-1.91625	4.41609	-2.71105	1.31851	0.00828187	2.98894	4.56276	2.55542	1.09205	0.3125	1.05	-1.57788	-2.6281	1.10739	2.94484		-2.79367	-0.526123	2.74419	-1.71317	1.9524	1.9669	1.92675	4.47958	-1.48789	1.61808	4.07235	3.47632	-0.22506	3.76234	2.88643	2
ST02	Statistic	Al2O3	SiO2	TiO2	CaO	Fe2O3	K2O	MgO	MnO	P2O5	TOT/C	TOT/S	LOI	Zr	Hf	Be	Bi	Ga	Co	Hg	Se	Cd	As	Mo	Cu	Ni	Ba	Pb	Sc	Sn	U	Th	Zn	Y	Sr	Cr	V	La	Ce	Ho	Dy	Er	Eu	Gd	Lu	Nb	Nd	Pr	Tm
	Nbr. of observations	5	5	5	5	5	5	5	5	5	5	5	5	5	5	5	5	5	5	5	5	5	5	5	5	5	5	5	5	5	5	5	5	5	5	5	5	5	5	5	5	5	5	5	5	5	5	5	5
	Minimum	16.67	19.34	1.79	0.02	9.35	0.05	0.02	0.02	0.32	3.05	0.04	23.2	399.1	9.9	1	0.5	33.1	5.6	0.03	0.25	0.05	3.2	1.4	64.2	11.2	68	7.5	25	3	2.3	18.4	48	12.8	19.6	390	390	21.9	43.9	0.46	2.45	1.54	0.58	2.12	0.31	20.8	15.4	4.38	0.26
	Maximum	31.18	30.2	3.7	0.07	37.9	0.12	0.05	0.11	1.36	9.97	0.43	31.8	696.9	18.3	3	0.9	56.5	10.5	0.18	1.1	0.2	7.7	3.3	133.7	33.9	111	22.4	41	8	5.6	31.4	88	29.7	24.2	600	589	40	75	1.04	5.24	3.3	1.17	4.65	0.66	42.9	26.5	7.6	0.56
	Median	27.21	19.62	3.03	0.02	18.09	0.08	0.04	0.03	1.03	5.35	0.12	25.1	609.1	15.3	1	0.8	54.9	9.9	0.09	0.5	0.2	6.2	1.9	120.6	12.3	74	13	38	6	3.9	28.5	56	26.5	23.2	460	451	28	55	0.85	4.08	2.91	1.06	4.08	0.53	35.2	22	5.94	0.43
	Mean	26.152	23.586	2.994	0.032	19.11	0.088	0.038	0.042	0.94	5.944	0.168	26.74	596.7	15.38	1.4	0.78	50.68	9.12	0.088	0.62	0.14	5.56	2.36	111.48	18.48	82	15.26	35.6	5.8	4.18	27.38	62.6	23.68	22.5	498	474.8	29.62	57.14	0.822	4.072	2.69	0.986	3.728	0.514	35.06	21.16	5.876	0.43
	Standard deviation (n)	5.08072	5.04951	0.661229	0.0193907	10.2412	0.0278568	0.0116619	0.0342929	0.352987	2.71094	0.135263	3.20662	106.832	3.07142	0.8	0.146969	8.83864	1.7893	0.056	0.364143	0.0734847	1.95202	0.788923	25.1642	9.00342	15.4013	5.55107	5.53534	1.72047	1.18558	4.73092	15.641	6.04397	1.76409	79.599	77.1917	6.03371	10.4691	0.217844	1.0232	0.652748	0.210865	0.924844	0.118423	7.84439	3.93985	1.06759	0.098387
	Skewness (Fisher)	-1.54308	0.620998	-1.31859	2.03153	1.40411	0.059582	-0.541387	2.14157	-1.05239	0.469237	1.87455	0.747679	-1.47122	-1.18122	2.23607	-1.73558	-2.17508	-2.05656	0.677584	0.38548	-0.608581	-0.33652	0.353235	-1.63757	1.15362	1.66586	0.0633975	-1.76815	-0.590129	-0.438913	-1.70716	0.8571	-1.33704	-0.888914	0.143721	0.51248	0.86294	0.829127	-0.800489	-0.525747	-1.19384	-1.84051	-1.12682	-0.892896	-1.32063	-0.232954	0.386281	-0.81142
	Kurtosis (Fisher)	2.66822	-3.25052	2.06719	4.1512	2.1309	-2.29886	-1.48789	4.66333	1.32632	-1.98495	3.94388	-1.37153	2.35756	1.41406	5	3.25103	4.78176	4.36748	-0.31224	-2.92111	-3.33333	-3.05697	-2.83632	2.70939	-0.207564	2.75462	-1.89742	3.53926	-0.0219138	-0.647359	3.11057	-1.03976	1.39178	-0.78537	-2.14771	-2.07756	1.20675	0.923216	-0.256571	-0.863538	0.810081	3.60097	0.479484	1.03442	1.92112	-1.25064	0.620411	1.62264
LTD	Statistic	Al2O3	SiO2	TiO2	CaO	Fe2O3	K2O	MgO	MnO	P2O5	TOT/C	TOT/S	LOI	Zr	Hf	Be	Bi	Li	Ga	Ge	Co	Hg	Se	Cd	As	Mo	Cu	Ni	Ba	Pb	Rb	Sc	Sn	U	Th	Zn	Y	Sr	Cr	V	La	Ce	Ho	Dy	Er	Eu	Gd	Lu	Nb
	Nbr. of observations	8	8	8	8	8	8	8	8	8	8	8	8	8	8	8	8	8	8	8	8	8	8	8	8	8	8	8	8	8	8	8	8	8	8	8	8	8	8	8	8	8	8	8	8	8	8	8	8
	Minimum	18.73	5.08	2.22	0.01	1.02	0.03	0.02	0.01	0.15	7.73	0.02	35.5	449	11.4	1	0.3	31.5	0.4	0.21	0.25	0.1	0.5	0.6	40.1	4.4	14	5.1	1.2	18	4	2.5	19.4	4	15.2	5.8	210	133	14.6	22.1	0.6	2.46	1.96	0.4	1.91	0.38	27	8.4	2.45
	Maximum	43.06	19.29	4.56	0.02	6.86	0.1	0.07	0.02	0.87	30.78	0.08	65.2	1050	24.1	2	0.5	65.3	1.1	0.56	2.1	0.1	0.5	1	102.3	16	43	8.7	4.7	44	8	5.6	45.3	7	35.6	23.3	560	355	29.3	49.9	1.29	5.99	4.5	0.98	4.09	0.89	57	21.5	5.58
	Median	31.55	12.535	3.4	0.01	3.4	0.045	0.03	0.015	0.595	16.145	0.02	46.35	692.5	16.7	1	0.4	49.7	0.8	0.245	0.75	0.1	0.5	0.8	54.6	6.4	25.5	7.65	1.95	32	6.5	4.25	32.85	5	24.1	12.55	365	226.5	22.1	33.55	0.92	3.71	3.19	0.645	2.695	0.62	40.5	13.85	3.795
	Mean	31.085	12.2713	3.25375	0.0125	3.50875	0.055	0.0375	0.015	0.55875	18.4425	0.035	49	692	16.7	1.25	0.375	47.8375	0.7625	0.32125	0.875	0.1	0.5	0.8	57.5375	7.9875	27.5	7.2375	2.4375	31.5	6	4.075	31.65	5.375	24.35	13.3875	373.75	235.75	21.3625	34.3375	0.89875	3.9075	3.07	0.66125	2.85625	0.6025	40.125	13.7625	3.85625
	Standard deviation (n)	7.30678	4.00122	0.757033	0.00433013	2.18061	0.0269258	0.0163936	0.005	0.236983	9.45667	0.0234521	12.0341	188.191	4.10609	0.433013	0.0661438	10.268	0.217586	0.13214	0.56899	0	0	0.122474	19.2119	3.96341	9.81071	1.32376	1.22264	9.98749	1.41421	1.12444	9.23133	0.992157	6.58559	5.11357	105.349	81.9752	5.79352	10.5588	0.252806	1.22324	0.887708	0.20715	0.835553	0.175125	8.40294	4.23525	1.17285
	Skewness (Fisher)	-0.0967559	-0.086967	0.158386	1.44016	0.26805	1.15003	1.35351	0	-0.474368	0.230371	1.41415	0.230256	0.561133	0.416019	1.44016	0.404061	0.0400816	-0.211406	1.29282	1.18666			-8.83278e-16	1.71561	1.39475	0.675596	-0.457053	1.2694	-0.0676032	-0.330719	-0.0551852	0.0259053	0.912879	0.377391	0.625754	0.263175	0.309509	0.0961219	0.397729	0.188239	0.526758	0.143562	0.307976	0.447672	0.14571	0.553151	0.501034	0.354252
	Notation:
		Lakes:	Violão	= VL
			Amendoim	= AM
			Três Irmãs	= TI1
				= TI2
				= TI3
			Fe-Soil	= Ferruginous soil
			Al-Soil	= Aluminium (silica) enriched ferruginous soil
			Fe-LC	= Ferruginous lateritic crust
			Al-LC	= Aluminous ferruginous lateritic crust
			basalt	= Weathered basalt
			PAAS	= Post-Archean Australian Shales
			UCC	= Upper Continental Crust
			BIF	= Banded Iron Formation
			-	= data not available
[truncated: 7 more columns]
