# Supplementary material for: Landscape and Climate Changes in Southeastern Amazonia from Quaternary Records of Upland Lakes
Source: MDPI journal article supplement (doi:10.3390/atmos14040621), 2023-03-24
Supplement: s1 [file s1 › Table S4.xlsx]

## Sheet: Planilha1
Table S4
Kruskal-Wallis Test results of the chemical parameters among grouping variables (lakes) (unit: major and minor elements (Si to TS) in %; trace and REEs in mg/kg).
	Si	Ti	Al	Fe	Mn	Mg	Ca	Na	K	P	TOC	TS	Ba	Sr	Rb	Pb	Sc	Th	U	Zr	Hf	Nb	Y	Cu
Chi-square	64.30	97.13	79.44	82.95	5.76	89.47	24.51	51.31	63.17	96.84	75.56	45.23	42.80	73.13	68.50	109.84	83.51	93.59	94.67	93.64	90.79	99.63	97.54	98.54
Asymp. Sig.	0.00	0.00	0.00	0.00	0.02	0.00	0.00	0.00	0.00	0.00	0.00	0.00	0.00	0.00	0.00	0.00	0.00	0.00	0.00	0.00	0.00	0.00	0.00	0.00
	Zn	As	Se	Mo	Hg	V	Cr	Ga	Co	Ni	La	Ce	Pr	Nd	Sm	Eu	Gd	Tb	Dy	Ho	Er	Tm	Yb	Lu
Chi-square	77.65	57.39	35.35	88.80	32.61	72.19	74.45	95.85	48.66	72.22	89.86	91.96	87.99	83.69	84.32	87.82	85.21	86.94	88.50	85.08	89.17	84.38	92.72	83.30
Asymp. Sig.	0.00	0.00	0.00	0.00	0.00	0.00	0.00	0.00	0.00	0.00	0.00	0.00	0.00	0.00	0.00	0.00	0.00	0.00	0.00	0.00	0.00	0.00	0.00	0.00
	Grouping variables: Lakes; values < 0.05 for the asymp.sig. (2-tailed) is significantly different.
