# Supplementary figures and images for: Landscape and Climate Changes in Southeastern Amazonia from Quaternary Records of Upland Lakes
Source: MDPI journal article supplement (doi:10.3390/atmos14040621), 2023-03-24

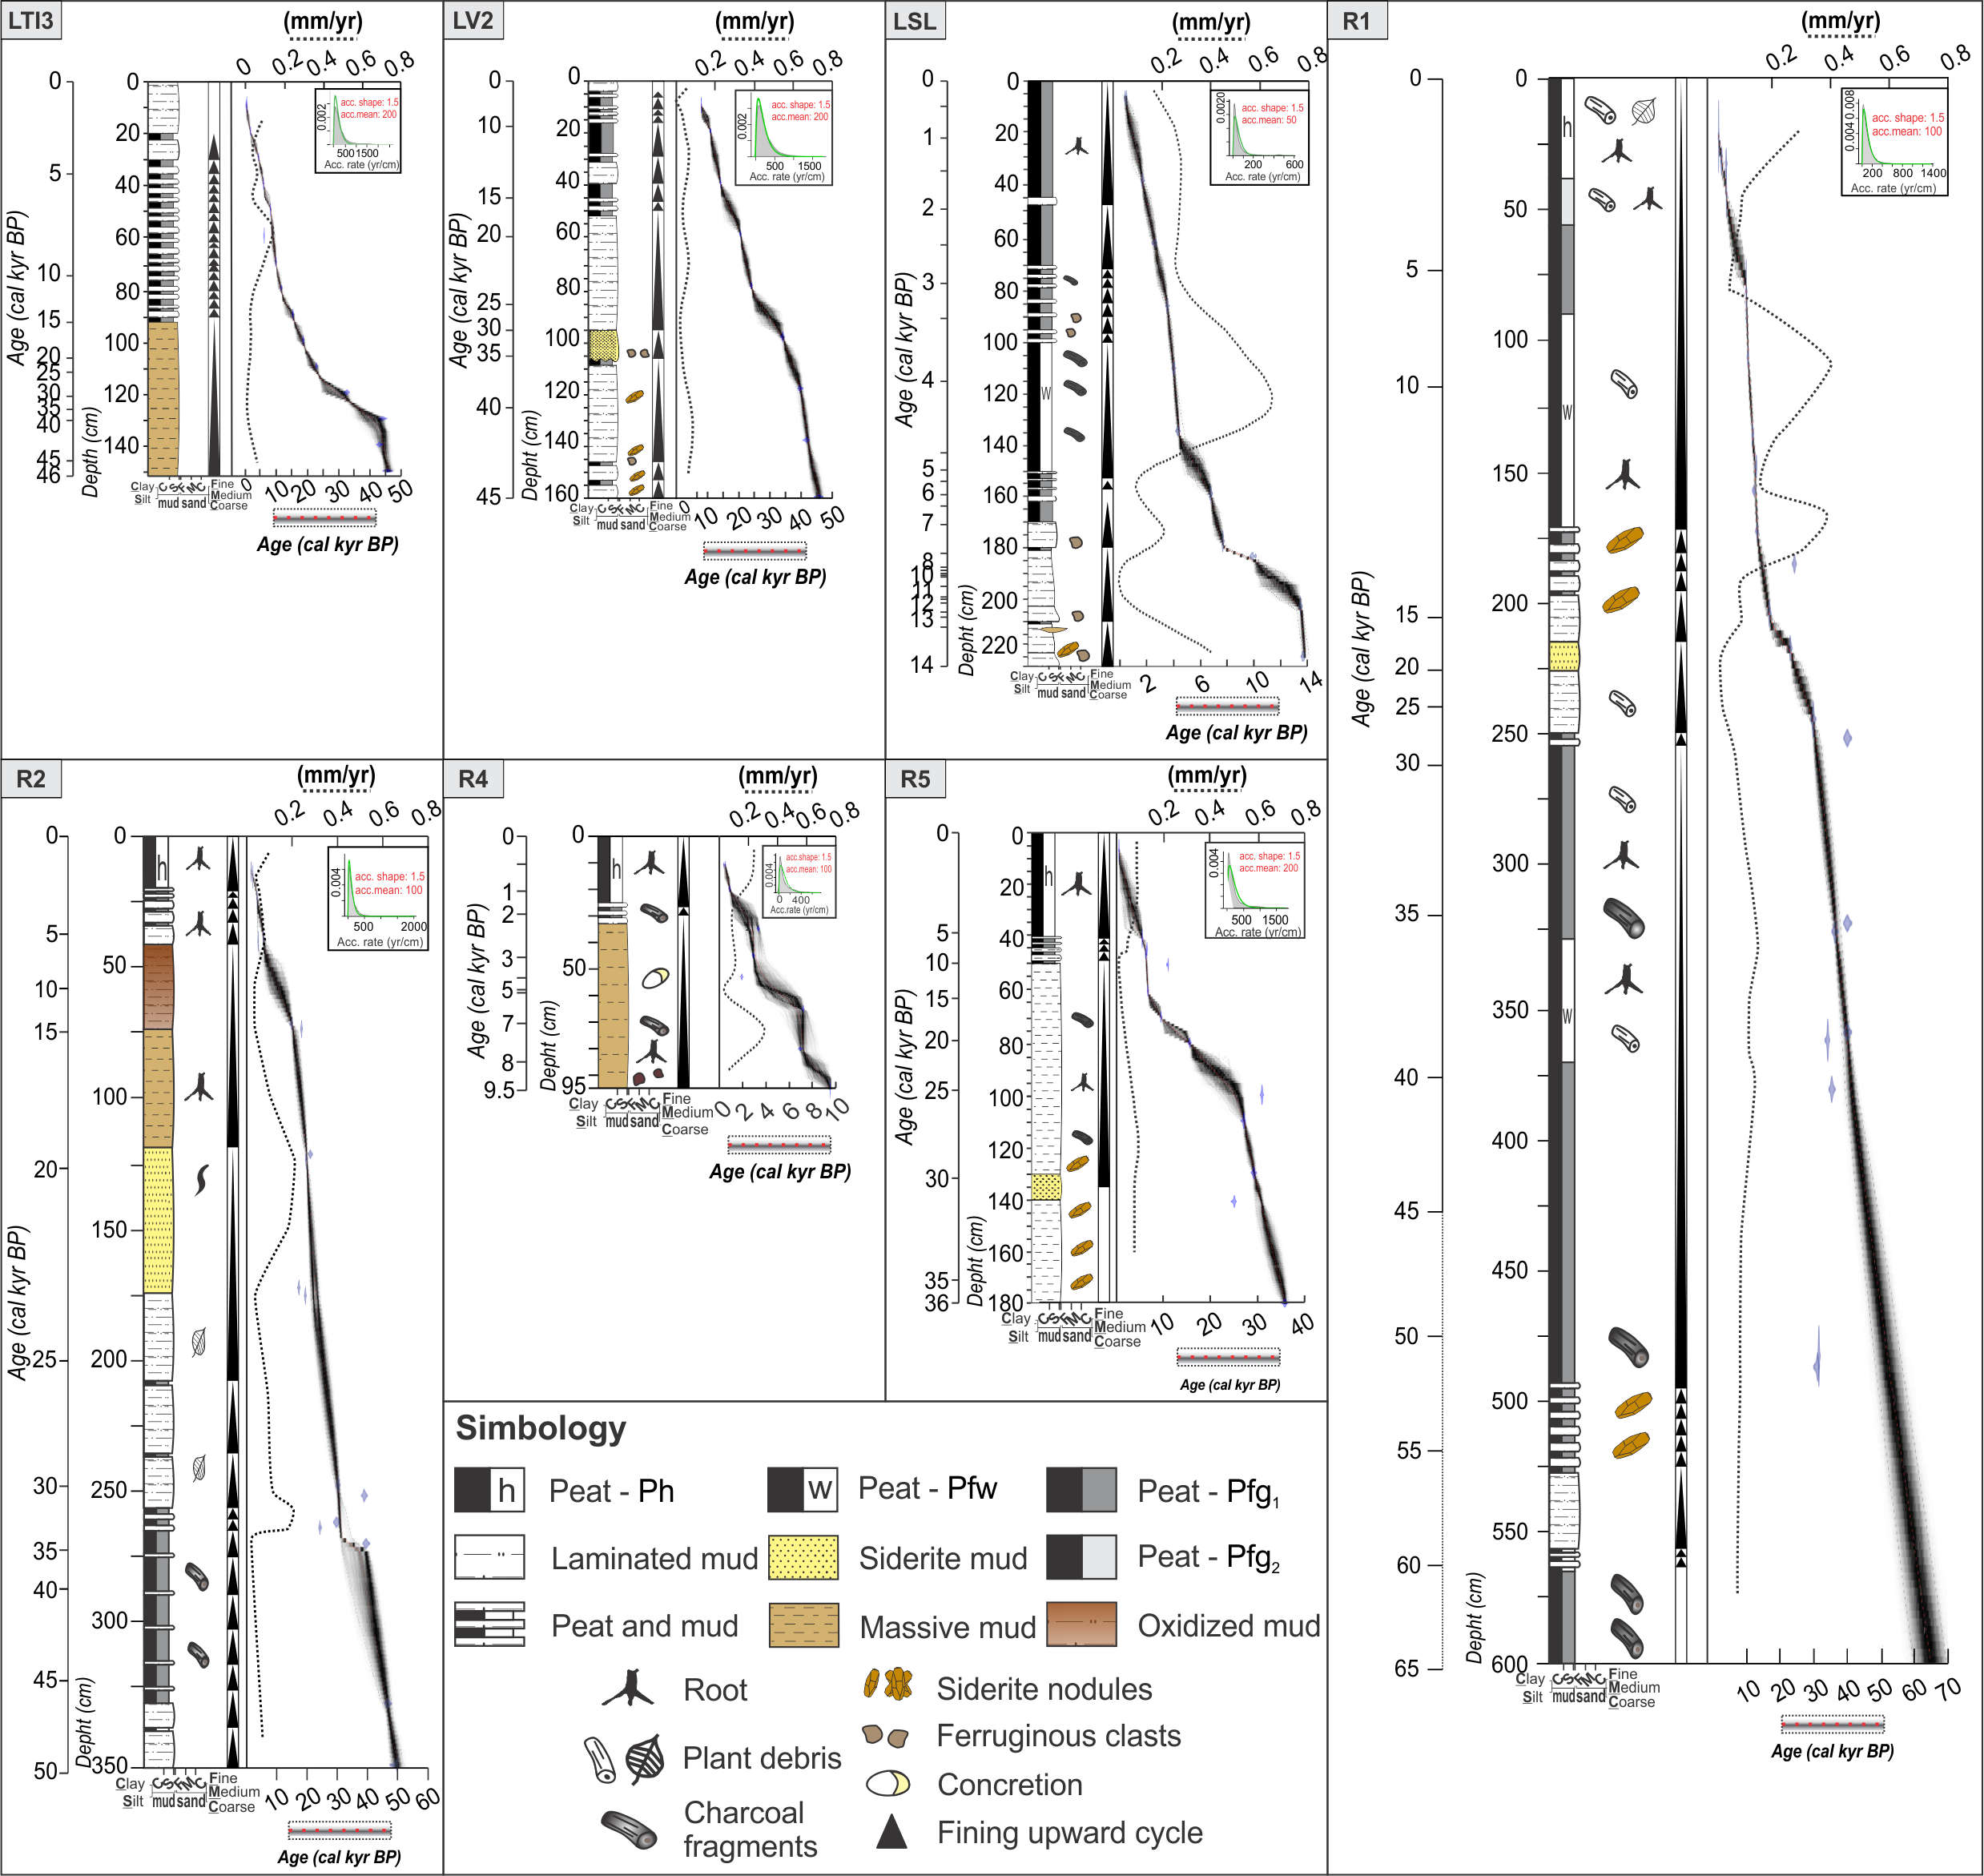

Supplement: s1 [file s1 › Fig. 1SM PART 1.tif]

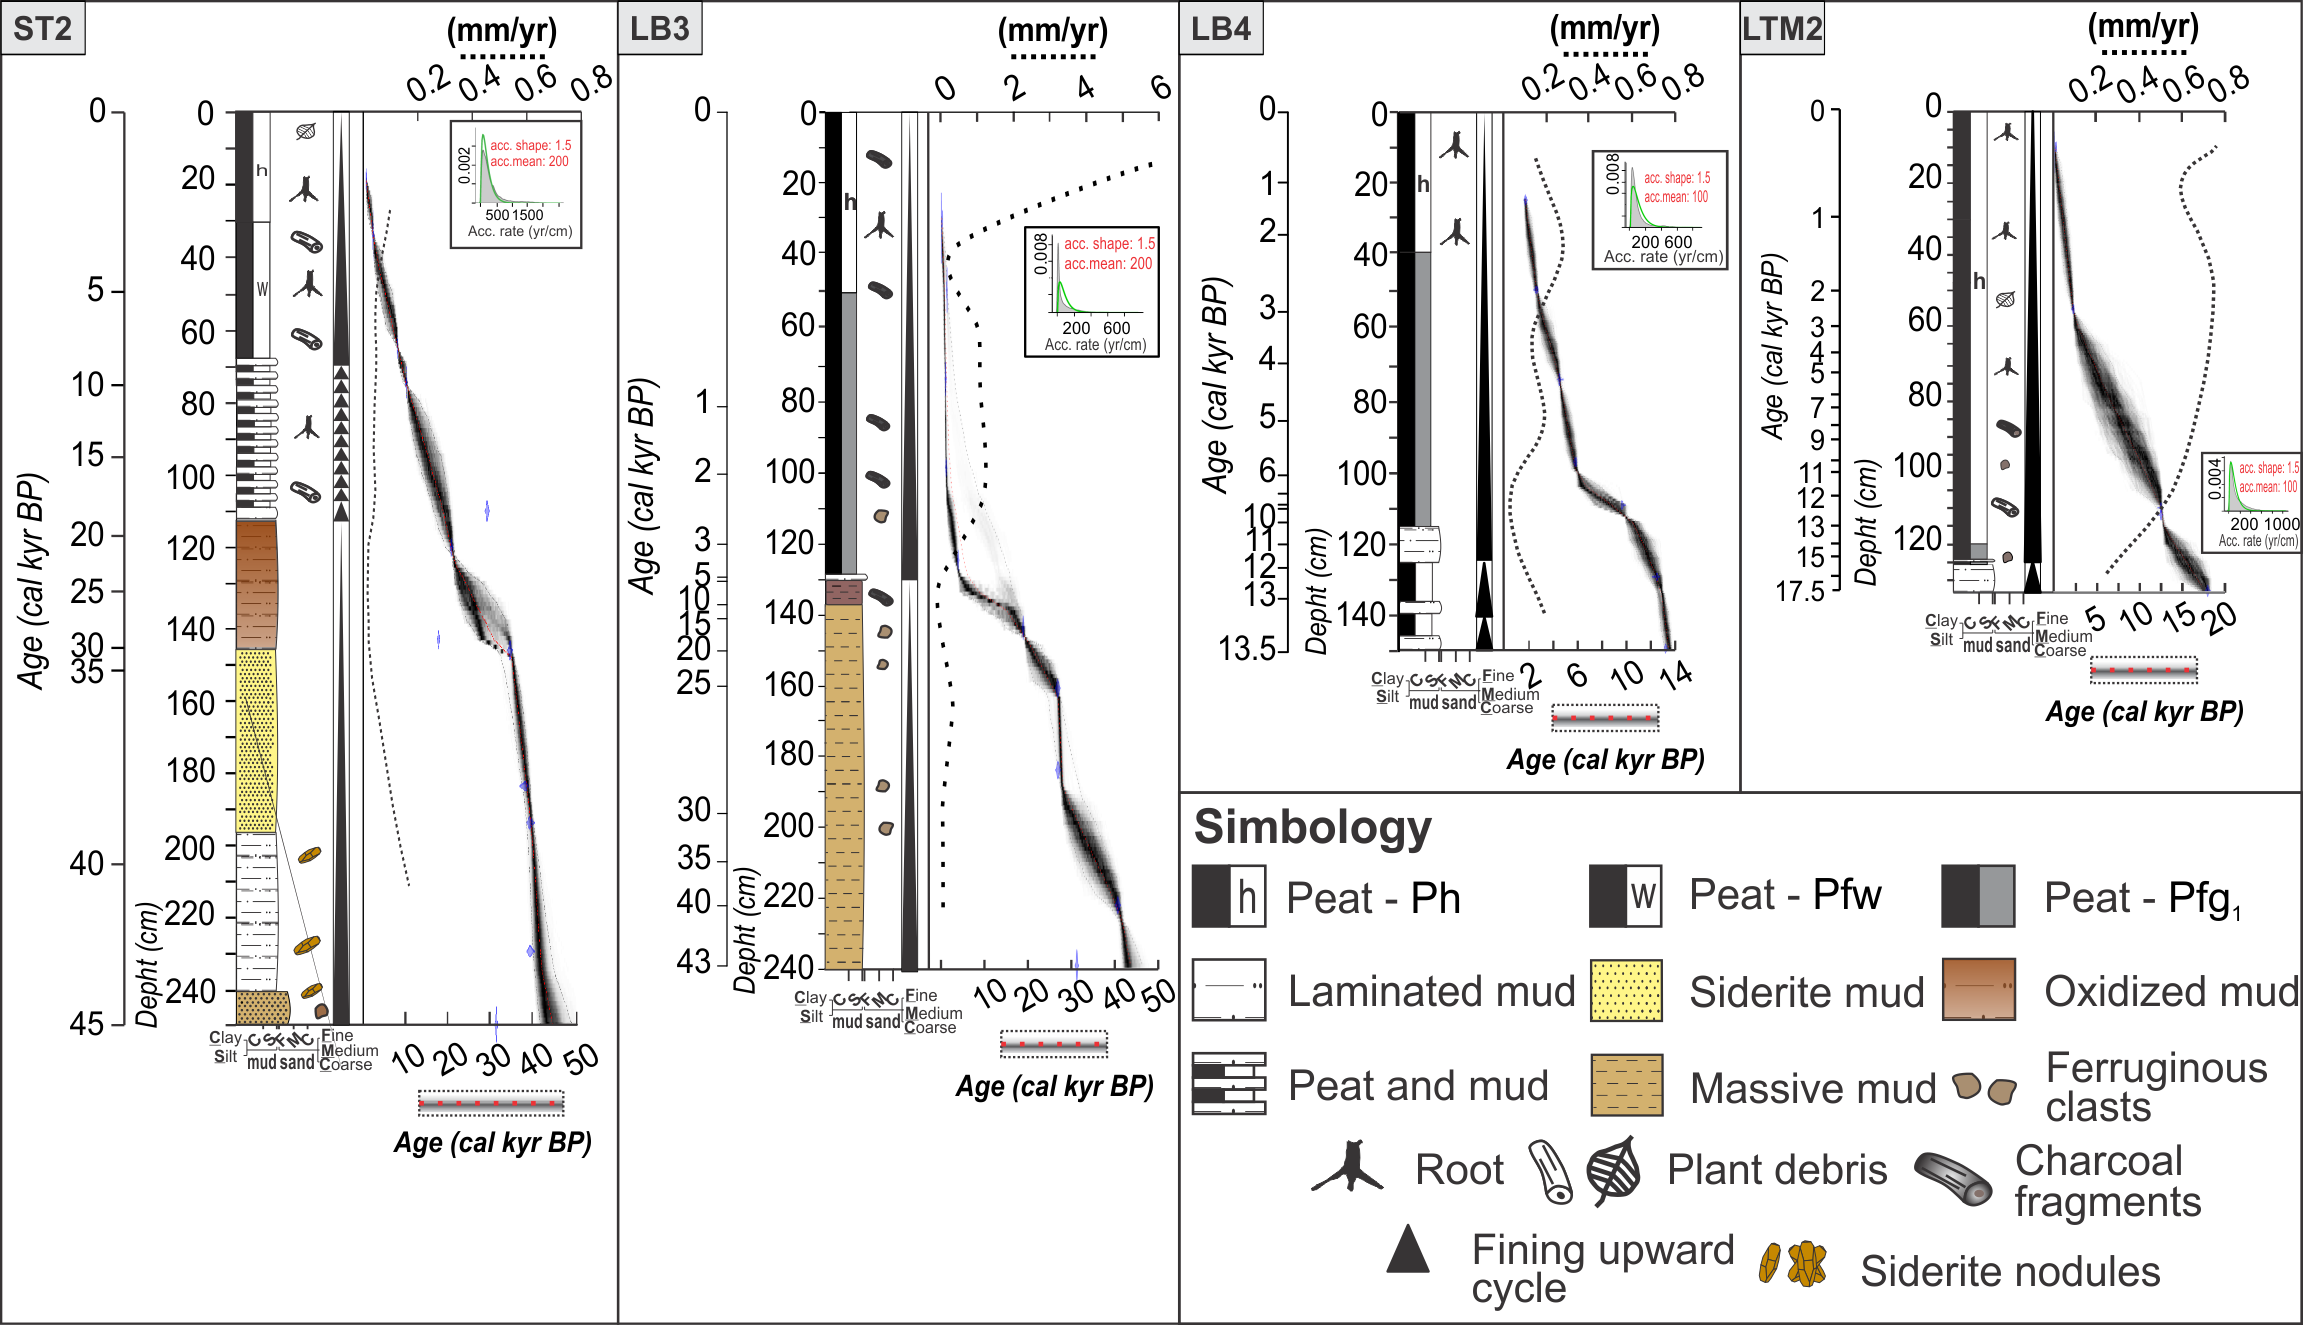

Supplement: s1 [file s1 › Fig. 1SM PART2.tif]
